# Supplementary material
Source: publisher site journal article supplement (https://www.dovepress.com/article/supplementary_file/536993/536993%20Revised%20Supplementary%20Tables%201-2%20.xlsx)
Supplement: Supplementary file 1 [file 536993%20Revised%20Supplementary%20Tables%201-2%20.xlsx]

## Sheet: Table S1
Table S1: Significantly differentially expressed genes in the skin biopsies of PV patients compared with health controls.
Protein	Protein Description	Gene Name	PG.ProteinGroups	PG.ProteinAccessions	PG.Genes	PG.ProteinDescriptions	PG.ProteinNames	SequenceNumber	PV-4	PV-5	PV-6	average PV	C4	C5	C6	average control	PV/control	t test p value
P06702	Protein S100-A9	S100A9	P06702	P06702;B2R4M6	S100A9	Protein S100-A9	S10A9_HUMAN	33	4682300	5867340	8353450	6301030	1111330	331696	260496	567841	11.0965	0.0067939
P05109	Protein S100-A8	S100A8	P05109	P05109	S100A8	Protein S100-A8	S10A8_HUMAN	29	5002740	5270920	9417930	6.56386e+06	1511980	355783	298663	722142	9.08944	0.0169641
P08779	Keratin, type I cytoskeletal 16	KRT16	P08779	P08779	KRT16	Keratin, type I cytoskeletal 16	K1C16_HUMAN	28	992180	691577	699757	794505	228328	50032.2	94273.5	124211	6.3964	0.00397838
P08567	Pleckstrin	PLEK	P08567	P08567;Q59GZ2	PLEK	Pleckstrin	PLEK_HUMAN	3	37367.8	66133.4	74414.4	59305.2	10154.7	10901.7	17448	12834.8	4.62066	0.0154242
P29034	Protein S100-A2	S100A2	P29034	P29034;R4GN49	S100A2	Protein S100-A2	S10A2_HUMAN	5	1273190	1104510	1275020	1.21757e+06	522971	96503.7	178912	266129	4.57513	0.00260307
P35326	Small proline-rich protein 2A	SPRR2A	P35326	P35326;P22531;P22532;P35325;Q9BYE4	SPRR2A	Small proline-rich protein 2A	SPR2A_HUMAN	4	200917	130576	110006	147166	51065.8	36702.9	14736.5	34168.4	4.30709	0.018572
P35321	Cornifin-A	SPRR1A	P35321	P35321;B7ZLF8	SPRR1A	Cornifin-A	SPR1A_HUMAN	4	142476	133491	69084.5	115017	66717.3	5133.22	18463.2	30104.6	3.82059	0.0461274
P22528	Cornifin-B	SPRR1B	P22528	P22528	SPRR1B	Cornifin-B	SPR1B_HUMAN	14	1930690	1968780	1204630	1.70137e+06	1049250	137383	306165	497599	3.41915	0.0324588
Q14764	Major vault protein	MVP	Q14764	Q14764;B4DDR2;B4DP93;B4DXN0;X5D2M8;X5D7S8;X5DNU0	MVP	Major vault protein	MVP_HUMAN	40	124762	123292	146585	131546	40047.1	36748.2	55616.4	44137.2	2.98039	0.000780423
P08729	Keratin, type II cytoskeletal 7	KRT7	P08729	P08729;B3KY79	KRT7	Keratin, type II cytoskeletal 7	K2C7_HUMAN	32	6623540	5118520	5029890	5590650	1603220	1812400	2215850	1.87716e+06	2.97825	0.00246568
O75023	Leukocyte immunoglobulin-like receptor subfamily B member 5	LILRB5	O75023	O75023;A0A0G2JMX5;A0A0G2JNP3;A0A0G2JNY7;A0A0G2JPM8;Q8NF80	LILRB5	Leukocyte immunoglobulin-like receptor subfamily B member 5	LIRB5_HUMAN	1	12355.1	15397	16344.3	14698.8	3314.37		6799.85	5057.11	2.90656	0.0175911
P40261	Nicotinamide N-methyltransferase	NNMT	P40261	P40261;B0YJ53	NNMT	Nicotinamide N-methyltransferase	NNMT_HUMAN	9	159654	98712.5	181430	146599	65582.4	63995.6	24602.8	51393.6	2.85247	0.0277332
Q15942	Zyxin	ZYX	Q15942	Q15942;B4DY85;H7C3R3;Q28617;Q96AF9;Q9BUS0	ZYX	Zyxin	ZYX_HUMAN	14	244867	186734	212664	214755	113282	59026.3	71778.3	81362.2	2.63949	0.00473337
Q12768	WASH complex subunit 5	WASHC5	Q12768	Q12768;E7EQI7;B4DLF2;Q53EL1	WASHC5	WASH complex subunit 5	WASC5_HUMAN	3	19442.6	19927.1	26618.7	21996.1		11079.3	5651.33	8365.32	2.62944	0.0325224
P21333	Filamin-A	FLNA	P21333	P21333;A6NDY9;Q60FE5;Q60FE6;A0A7P0NMY4	FLNA	Filamin-A	FLNA_HUMAN	170	918690	490482	593582	667585	269316	182253	312099	254556	2.62255	0.0373192
P05186	Alkaline phosphatase, tissue-nonspecific isozyme	ALPL	P05186	P05186;B2R6Q2;B7Z1D1;Q9UIL5;G8I0M6	ALPL	Alkaline phosphatase, tissue-nonspecific isozyme	PPBT_HUMAN	5	13394.2	19887.4	22729.9	18670.5	7495.83	9577.59	4513.07	7195.5	2.59475	0.0214508
Q96CW1	AP-2 complex subunit mu	AP2M1	Q96CW1	Q96CW1;A0A087WY71;A0A8I5KWD3;B4DNB9;C9JGT8;C9JJD3;C9JPV8;C9JTK4;E9PFW3;H7C4C3;A0A8I5KT55;A0A8I5QJU5;C9JJ47	AP2M1	AP-2 complex subunit mu	AP2M1_HUMAN	7	57193.7	41574.6	72973.2	57247.2	16729.1	17422.7	32134.1	22095.3	2.59092	0.0274776
Q6IBB0	IFITM2 protein	IFITM2	Q6IBB0	Q14617;Q6IBB0	IFITM2	IFITM2 protein	Q6IBB0_HUMAN	3	37173.5	49568	51120.8	45954.1		23269.8	13299	18284.4	2.5133	0.0267993
P78539	Sushi repeat-containing protein SRPX	SRPX	P78539	P78539;V9HW11	SRPX	Sushi repeat-containing protein SRPX	SRPX_HUMAN	5	33096.5	31397.7	24227.9	29574	12264.6	9601.43	13661.4	11842.5	2.49728	0.00394005
P05783	Keratin, type I cytoskeletal 18	KRT18	P05783	P05783;F8VZY9;B2RA03;I6L965	KRT18	Keratin, type I cytoskeletal 18	K1C18_HUMAN	24	331290	333752	258854	307965	142609	120717	119348	127558	2.41432	0.00216779
P30520	Adenylosuccinate synthetase isozyme 2	ADSS2	P30520	P30520;A0A024R5Q7;B4E1L0	ADSS2	Adenylosuccinate synthetase isozyme 2	PURA2_HUMAN	8	19556.7	22797.6	30532.6	24295.6	4284.69	9724.31	16409.7	10139.6	2.39612	0.0416153
Q08AF3	Schlafen family member 5	SLFN5	Q08AF3	Q08AF3;B4E0B1;B4E128	SLFN5	Schlafen family member 5	SLFN5_HUMAN	2	14132.9	12926.8	10543	12534.2		3561.96	6979.1	5270.53	2.37817	0.03
P14317	Hematopoietic lineage cell-specific protein	HCLS1	P14317	P14317;E7EVW7;B4DQ92;B4DTP2	HCLS1	Hematopoietic lineage cell-specific protein	HCLS1_HUMAN	13	142840	127701	130871	133804	50236.3	59970.7	60449.9	56885.6	2.35216	0.000172735
P00488	Coagulation factor XIII A chain	F13A1	P00488	P00488;B2R6V9;B4E2L8	F13A1	Coagulation factor XIII A chain	F13A_HUMAN	52	493487	359852	663663	505667	181672	150209	313752	215211	2.34964	0.0454469
Q9BQE5	Apolipoprotein L2	APOL2	Q9BQE5	Q9BQE5;B4E1T5;J3KQL8	APOL2	Apolipoprotein L2	APOL2_HUMAN	1	33063.7	26045.1	16774.3	25294.4	9705.07	9301.79	13316.5	10774.5	2.34762	0.0410963
Q99459	Cell division cycle 5-like protein	CDC5L	Q99459	Q99459;B3KY60;B4DSH1	CDC5L	Cell division cycle 5-like protein	CDC5L_HUMAN	2	12876.3	12682.3	10586.1	12048.2	3927.13	4819.73	6712.98	5153.28	2.33797	0.00331668
Q9UKV8	Protein argonaute-2	AGO2	Q9UKV8	Q9H9G7;Q9UKV8;A8KA05;A4FVC0;B4DY67;B4E1P5	AGO2	Protein argonaute-2	AGO2_HUMAN	2	20153.8	24952.2		22553	8069.75		11379.9	9724.83	2.31912	0.0479424
O15127	Secretory carrier-associated membrane protein 2	SCAMP2	O15127	O15127;A0A140VK92;A8K769;B3KU14;H3BN93;H3BPL9;H3BUB6;H3BV04;Q6IBK3	SCAMP2	Secretory carrier-associated membrane protein 2	SCAM2_HUMAN	2	40087.7	45467.1	61745.7	49100.2	17099.3	17880.1	29598.9	21526.1	2.28096	0.0227984
Q9Y3Z3	Deoxynucleoside triphosphate triphosphohydrolase SAMHD1	SAMHD1	Q9Y3Z3	Q9Y3Z3;A0A2R8YCS7;A0A2R8Y5D2;A0A2R8YD90;A0A2R8YF51;A0A804HL67;Q59H15;A0A2R8Y586	SAMHD1	Deoxynucleoside triphosphate triphosphohydrolase SAMHD1	SAMH1_HUMAN	32	116270	94919.8	100925	104038	51203.4	38732	48538.3	46157.9	2.25396	0.00144363
Q14254	Flotillin-2	FLOT2	Q14254	Q14254;E7EMK3;J3QLD9;K7EKW9;Q6FG43;Q9BTI6	FLOT2	Flotillin-2	FLOT2_HUMAN	7	25646.3	39893.9	38126.3	34555.5	15397.7	16922.2	14720.1	15680	2.20379	0.0140758
P05787	Keratin, type II cytoskeletal 8	KRT8	P05787	P05787;Q7L4M3;Q969I0	KRT8	Keratin, type II cytoskeletal 8	K2C8_HUMAN	27	232814	165253	177872	191980	84293	94833.8	82531.5	87219.4	2.20111	0.00766914
P05141	ADP/ATP translocase 2	SLC25A5	P05141	P05141;P12235;P12236;Q9H0C2;A0A0S2Z3H3;Q6I9V5;Q6NVC0;A0A0S2Z359;A8K787;Q59EI9;Q59EP7;V9GYG0	SLC25A5	ADP/ATP translocase 2	ADT2_HUMAN	15	215116	198911	289698	234575	64664.2	82430.1	173194	106763	2.19716	0.0430845
P06737	Glycogen phosphorylase, liver form	PYGL	P06737	P06737;B2R825;E9PK47;Q6P1L4	PYGL	Glycogen phosphorylase, liver form	PYGL_HUMAN	24	87610.2	128387	154905	123634	53580.3	58948.4	56299.2	56276	2.19692	0.0265122
O75888	Tumor necrosis factor ligand superfamily member 13	TNFSF13	O75888	O75888;A0A0A6YY99;Q2QBA2;Q6FGN4;Q6FGR7;B3KR02;K7EJ28;Q6U6I7;Q8NFH7	TNFSF13	Tumor necrosis factor ligand superfamily member 13	TNF13_HUMAN	2	29618.7	22646.3	26202	26155.7	9483.05	12294.8	14428.3	12068.7	2.16723	0.00467433
Q9BRR6	ADP-dependent glucokinase	ADPGK	Q9BRR6	Q9BRR6;H3BN66;H3BRS6;H3BTH4	ADPGK	ADP-dependent glucokinase	ADPGK_HUMAN	4	21493.2	25831.4	37878	28400.9	12026.5	13132.2	14393.6	13184.1	2.15418	0.037116
P25774	Cathepsin S	CTSS	P25774	P25774;A0A7P0T904;A0A804DAZ0;A0A7P0T844;A0A7P0T8H4;A0A7P0T8U1;A0A7P0TAQ0;U3KQE7	CTSS	Cathepsin S	CATS_HUMAN	3	46762.1	47370.1	54707.9	49613.4	20709.4	19587.4	29910	23402.3	2.12002	0.00321073
P16615	Sarcoplasmic/endoplasmic reticulum calcium ATPase 2	ATP2A2	P16615	P16615;A0A0S2Z3L2	ATP2A2	Sarcoplasmic/endoplasmic reticulum calcium ATPase 2	AT2A2_HUMAN	17	186729	144655	246128	192504	81797.9	69807.9	121484	91029.9	2.11473	0.0381994
P12814	Alpha-actinin-1	ACTN1	P12814	P12814;A0A024R694;A0A7I2V4Y4;A0A804HII9;A0A804HIN7;A0A804HJU8;A0A804HK61;A0A804HKE2;A0A804HL31;A0A804HLD0;A0A804HLF4;B7Z565;H9KV75;Q86TX4	ACTN1	Alpha-actinin-1	ACTN1_HUMAN	45	367998	236164	280247	294803	164828	95060.5	159172	139687	2.11046	0.0256562
Q93084	Sarcoplasmic/endoplasmic reticulum calcium ATPase 3	ATP2A3	Q93084	Q93084;A8K9K1	ATP2A3	Sarcoplasmic/endoplasmic reticulum calcium ATPase 3	AT2A3_HUMAN	1	32939.4	41168.2	34938.2	36348.6		19402.9	15229.3	17316.1	2.09912	0.0127696
P34897	Serine hydroxymethyltransferase, mitochondrial	SHMT2	P34897	P34897;V9HW06;B4DJQ3;G3V241;G3V2W0;G3V4T0;G3V4X0;G3V5L0;Q5HYG8;G3V2E4;G3V3Y8;G3V4W5;G3V540;Q53ET4;Q5BJF5	SHMT2	Serine hydroxymethyltransferase, mitochondrial	GLYM_HUMAN	13	32243.9	27613.3	21773.3	27210.2	19637.9	6064.89	13331.9	13011.6	2.09123	0.0456818
Q16647	Prostacyclin synthase	PTGIS	Q16647	Q16647;Q6LEN2;Q6LEN0	PTGIS	Prostacyclin synthase	PTGIS_HUMAN	14	63961.5	67386.3	62405.5	64584.4	22327.1	47260.7	25333.2	31640.3	2.04121	0.014604
P37235	Hippocalcin-like protein 1	HPCAL1	P37235	P37235;C9JW46;E9PC71;Q68CP5;Q6FGY1	HPCAL1	Hippocalcin-like protein 1	HPCL1_HUMAN	1	30482.5	46103.5	43781.3	40122.4	12901.2	28389.3	18232.9	19841.1	2.02218	0.0381577
P04233	HLA class II histocompatibility antigen gamma chain	CD74	P04233	P04233;A9YLN4;M1VPF6;U6FVB0;H0YBZ8;E7EQJ3	CD74	HLA class II histocompatibility antigen gamma chain	HG2A_HUMAN	5	53207.8	67922.3	57185.6	59438.6	29289.8	19412.7	39717.2	29473.2	2.0167	0.0149747
Q15005	Signal peptidase complex subunit 2	SPCS2	Q15005	Q15005;B4DDB9;E9PI68;E9PL01;H0YE04	SPCS2	Signal peptidase complex subunit 2	SPCS2_HUMAN	3	49456.4	37789.9	49401.6	45549.3	14517.4	20346.4	32913.8	22592.5	2.01612	0.0262757
P50552	Vasodilator-stimulated phosphoprotein	VASP	P50552	P50552;A0A024R0V4;A0A0S2Z4I7;A0A0S2Z4I9;A0A0S2Z4N8;A0A994J7X3	VASP	Vasodilator-stimulated phosphoprotein	VASP_HUMAN	12	170216	261850	265470	232512	138447	95711.5	112404	115521	2.01273	0.0252007
Q9BRJ6	Uncharacterized protein C7orf50	C7orf50	Q9BRJ6	Q9BRJ6;C9JQV0;H7C0T1;H7C2R9	C7orf50	Uncharacterized protein C7orf50	CG050_HUMAN	1	34939.9	33390	39686.3	36005.4	17965.8	9524.88	26313.3	17934.7	2.00759	0.0255167
P13796	Plastin-2	LCP1	P13796	P13796;B3KUI1;Q53FI1;V9HWJ7	LCP1	Plastin-2	PLSL_HUMAN	40	216037	251262	364760	277353	159373	104717	151492	138527	2.00215	0.0444745
P61289	Proteasome activator complex subunit 3	PSME3	P61289	P61289;K7ENH2;B3KQ25;J7FRP4;K7ESG5;K9J957;Q6FHK7;V9HWJ8	PSME3	Proteasome activator complex subunit 3	PSME3_HUMAN	5	30548.4	25134.1	28331.4	28004.6	13501.4	11231.3	17478.1	14070.3	1.99034	0.004437
Q9Y490	Talin-1	TLN1	Q9Y490	Q9Y490	TLN1	Talin-1	TLN1_HUMAN	100	207135	196155	222064	208451	99895	91653.4	122922	104823	1.98859	0.000987784
Q9GZT3	SRA stem-loop-interacting RNA-binding protein, mitochondrial	SLIRP	Q9GZT3	Q9GZT3;A0A087WUN7;G3V2S9;G3V4X6;H0YJ40;H0YJI1	SLIRP	SRA stem-loop-interacting RNA-binding protein, mitochondrial	SLIRP_HUMAN	4	53522.8	69166.9	41367.7	54685.8	26248	20157.3	37684.8	28030	1.95097	0.0491991
Q15417	Calponin-3	CNN3	Q15417	Q15417;E9PDU6;Q9BWY6	CNN3	Calponin-3	CNN3_HUMAN	6	48459.3	41425.2	33878.5	41254.3	11717.9	28093.6	24226.7	21346.1	1.93264	0.0374165
Q06278	Aldehyde oxidase	AOX1	Q06278	Q06278;A0A286LWX1;B4DNI5;B4DVF1	AOX1	Aldehyde oxidase	AOXA_HUMAN	12	38777.4	35505	44081.7	39454.7	14205.6		26644	20424.8	1.93171	0.0434258
P42224	Signal transducer and activator of transcription 1-alpha/beta	STAT1	P42224	P42224;A0A669KB52;A0A669KB53;A0A669KB56;A0A669KB68;A0A669KBA4;A0A669KBI6;A0A8V8TN81;J3KPM9;A0A669KB75;E7EPD2	STAT1	Signal transducer and activator of transcription 1-alpha/beta	STAT1_HUMAN	11	54388.2	51891.2	68849.9	58376.4	35377.8	29547.7	27008.4	30644.6	1.90495	0.00896887
Q9NUQ9	CYFIP-related Rac1 interactor B	CYRIB	Q9NUQ9	Q9NUQ9;A0A8V8TMP7	CYRIB	CYFIP-related Rac1 interactor B	CYRIB_HUMAN	10	59848.1	56959.7	79741.2	65516.3	29047.8	35558.1	39586.5	34730.8	1.8864	0.016802
Q92973	Transportin-1	TNPO1	Q92973	Q92973;A0A7P0T944;A0A7P0T9C0;A0A7P0TBF0;A0A7P0Z4D3	TNPO1	Transportin-1	TNPO1_HUMAN	8	29358.9	33291	35459.4	32703.1	10608.6	22911.2	18520.3	17346.7	1.88526	0.0187488
P21283	V-type proton ATPase subunit C 1	ATP6V1C1	P21283	P21283;Q8NEY4;A0A024R9I0;A0A0U1RR16;A8KA87;E7EV59	ATP6V1C1	V-type proton ATPase subunit C 1	VATC1_HUMAN	2	29411.8	40603.8	35173.7	35063.1	9803.22	23081.6	23557.8	18814.2	1.86365	0.0428241
P52272	Heterogeneous nuclear ribonucleoprotein M	HNRNPM	P52272	P52272;A0A087X0X3;M0QZM1;Q59ES8;Q7KYM9	HNRNPM	Heterogeneous nuclear ribonucleoprotein M	HNRPM_HUMAN	47	440732	438537	444714	441328	244065	121495	346348	237303	1.85977	0.0349232
Q99439	Calponin-2	CNN2	Q99439	Q99439;A0A087X271;B2RWM5;B4DDF4;B4DUT8;H3BVI6;Q53GK7;Q6FHC3;Q6FHE4;K7ES69	CNN2	Calponin-2	CNN2_HUMAN	9	38886.6	40974.4	46374.5	42078.5	26282.8	22006.6	19785.1	22691.5	1.85437	0.00272143
P40227	T-complex protein 1 subunit zeta	CCT6A	P40227	P40227;A1JUI8;B2R9K8;B4DN39;B4DPJ8;Q59ET3	CCT6A	T-complex protein 1 subunit zeta	TCPZ_HUMAN	18	96951.7	87033	104322	96102.2	44097	32833.4	79197.1	52042.5	1.84661	0.041125
O15067	Phosphoribosylformylglycinamidine synthase	PFAS	O15067	O15067;A8K8N7;A8K9T9;B4DJ26;Q6P4B4;H0YGH1;Q9BR56	PFAS	Phosphoribosylformylglycinamidine synthase	PUR4_HUMAN	3	15526	15232.4	14228.5	14995.6	9972.34		6286.38	8129.36	1.84463	0.0183356
Q641Q2	WASH complex subunit 2A	WASHC2A	Q641Q2;Q9Y4E1	Q641Q2;Q9Y4E1;A0A087WYF6;A0A0A0MT65;E7ESD2;F8W7U3;J3KP36;A8K5W5;B4DHJ2;B4DPK9;B7ZME8	WASHC2A;WASHC2C	WASH complex subunit 2A	WAC2A_HUMAN;WAC2C_HUMAN	1	13550.5		12378.9	12964.7	7675.2	8559.52	4955.95	7063.56	1.83544	0.0275648
Q02809	Procollagen-lysine,2-oxoglutarate 5-dioxygenase 1	PLOD1	Q02809	Q02809;B2R5M9;B4DGN8	PLOD1	Procollagen-lysine,2-oxoglutarate 5-dioxygenase 1	PLOD1_HUMAN	8	106243	80623.2	119695	102187	55248.4	43694.9	68081.8	55675	1.83542	0.0258689
P25098	Beta-adrenergic receptor kinase 1	GRK2	P25098	P25098;P35626;A0A0S2Z392;A0A0S2Z3I6;A8K869;Q59F73	GRK2	Beta-adrenergic receptor kinase 1	ARBK1_HUMAN	3	7728.06	9224.94	7783.28	8245.43	4269.21		4718.77	4493.99	1.83477	0.010539
P11216	Glycogen phosphorylase, brain form	PYGB	P11216	P06737;P11216;P11217;A0A0M4FEM1;B2R825;B2RB32;B4DRQ4;B4DRW6;B4DSD8;E9PK47;Q59GM9;Q6P1L4	PYGB	Glycogen phosphorylase, brain form	PYGB_HUMAN	53	408459	292671	268570	323233	146970	169103	213174	176416	1.83223	0.0362176
P49368	T-complex protein 1 subunit gamma	CCT3	P49368	P49368;B3KX11;Q2TU64;Q59H77;E9PM09;E9PRC8;Q5SZW8;Q5SZX6;Q5SZX9	CCT3	T-complex protein 1 subunit gamma	TCPG_HUMAN	18	100495	96596.8	104924	100672	49042.6	35191.1	80623.2	54952.3	1.83199	0.0286322
P26038	Moesin	MSN	P26038	P26038;A0A8V8TKR9;V9HWC0;Q6PJT4;V9GZ54	MSN	Moesin	MOES_HUMAN	52	403190	379708	531683	438194	201529	206587	310132	239416	1.83026	0.0280961
O15355	Protein phosphatase 1G	PPM1G	O15355	O15355;Q6IAU5;B2R665;B3KXL8;B4DDC8	PPM1G	Protein phosphatase 1G	PPM1G_HUMAN	1	33035.8	30650.5	32876.2	32187.5	11192.8	19557.6	22300.8	17683.7	1.82018	0.0133629
Q8WXF1	Paraspeckle component 1	PSPC1	Q8WXF1	Q8WXF1;B4DWI8;X6RDA4	PSPC1	Paraspeckle component 1	PSPC1_HUMAN	10	41272.5	49653.2	49129.9	46685.2	25456	18015	33758.4	25743.1	1.8135	0.0167322
P14618	Pyruvate kinase PKM	PKM	P14618	P14618;V9HWB8;A0A804F6T5;A0A804F729;A0A8V8TNX9;B4DNK4;B4DRT3;Q504U3;Q8WUW7	PKM	Pyruvate kinase PKM	KPYM_HUMAN	60	825893	626026	882490	778136	439573	280600	570483	430219	1.8087	0.0383056
Q92930	Ras-related protein Rab-8B	RAB8B	Q92930	P61006;Q92930;B3KTE3;B4DMS1;H0YL94;H0YLJ8;H0YMN7;H0YNE9	RAB8B	Ras-related protein Rab-8B	RAB8B_HUMAN	7	79893.1	112586	127885	106788	60589.7	49251.1	67567.8	59136.2	1.8058	0.0345101
Q13576	Ras GTPase-activating-like protein IQGAP2	IQGAP2	Q13576	Q13576;B7Z7U6;B7Z881;F5H7S7;Q59HA3	IQGAP2	Ras GTPase-activating-like protein IQGAP2	IQGA2_HUMAN	18	45192.8	46319.1	45162.8	45558.2	18735.3	37913.3	19174.1	25274.2	1.80256	0.0327979
P04179	Superoxide dismutase [Mn], mitochondrial	SOD2	P04179	A0A384NL29;P04179;F5GYZ5;F5H4R2;Q7Z7M4;Q7Z7M5;Q7Z7M6;Q7Z7M7;F5GXZ9;F5H3C5;G5E9P6;G8JLJ2;Q4ZJI1;Q6LE88;Q96AM7;Q9UG59	SOD2	Superoxide dismutase [Mn], mitochondrial	SODM_HUMAN	14	404985	264969	315229	328394	187810	217545	142405	182587	1.79857	0.0348013
Q05682	Caldesmon	CALD1	Q05682	Q05682;A0A140VKA0;C9J813;E7EX44;B4DPW5;B7Z6G4;E9PGZ1;Q6P707;Q6PJM5;Q9NYG1	CALD1	Caldesmon	CALD1_HUMAN	30	302861	218410	211988	244420	178198	127129	107450	137592	1.7764	0.0415193
P48059	LIM and senescent cell antigen-like-containing domain protein 1	LIMS1	P48059	P48059;A0A0J9YXC7;A0A8Q3WKI3;A0A8Q3WKJ2;A0A8Q3WKK6;A0A8Q3WKP0;A0A0M3HER1;A0A8Q3WLN4;A0A8Q3WLX8	LIMS1	LIM and senescent cell antigen-like-containing domain protein 1	LIMS1_HUMAN	4	34977.8	41100	27744.9	34607.6	20255.7	19384.9	19064	19568.2	1.76856	0.0178411
P08195	Amino acid transporter heavy chain SLC3A2	SLC3A2	P08195	P08195;A0A7P0T9F7;A0A7P0TAN7;A0A7P0TAS6;A0A7P0TBF8;A0A7P0Z4A0;A0A7P0Z4P5;F5GZS6;A0A7P0T8F1;A0A7P0T8U7;B4E2Z3;F5GZI0;F5H056;H0YH36	SLC3A2	Amino acid transporter heavy chain SLC3A2	4F2_HUMAN	12	84783.8	69855.4	105316	86651.7	39172.3	62372.7	45562.4	49035.8	1.76711	0.0385605
P09651	Heterogeneous nuclear ribonucleoprotein A1	HNRNPA1	P09651	P09651;Q32P51;A0A7I2V3R8;A0A7I2V3W0;F8W6I7;Q0VAC0;Q6IPF2;A0A024RB53;A0A7I2V2F1;A0A7I2V2M7;A0A7I2V2Q7;A0A7I2V2R4;A0A7I2V2X1;A0A7I2V334;A0A7I2V360;A0A7I2V3K5;A0A7I2V3U8;A0A7I2V453;A0A7I2V459;A0A7I2V497;A0A7I2V4E2;A0A7I2V4F8;A0A7I2V4P7;A0A7I2V520;A0A7I2V5N7;A0A7I2V5P1;A0A7I2V661;A0A7I2V666;A0A7I2YQX9;A0A7I2YQY2;B4DP35;B4E0B5;H0YH80;Q3MI39;Q9BSM5	HNRNPA1	Heterogeneous nuclear ribonucleoprotein A1	ROA1_HUMAN	29	337261	333357	355891	342170	220401	109222	254138	194587	1.75844	0.029124
P61158	Actin-related protein 3	ACTR3	P61158	P61158;B4DT29;B4DTI0;B4DXW1;Q59FV6	ACTR3	Actin-related protein 3	ARP3_HUMAN	28	298446	310665	400950	336687	188737	131904	255552	192064	1.75299	0.0398846
P17844	Probable ATP-dependent RNA helicase DDX5	DDX5	P17844	P17844;A0A0G2JLI4;J3KTA4;A0A7I2V2S0;A0A7I2V507;B4DN41;B4DNG2;B5BUE6;Q59E92;Q7Z2V5;A0A7I2V5F5;J3KRZ1;J3QSF1	DDX5	Probable ATP-dependent RNA helicase DDX5	DDX5_HUMAN	14	63505.1	57422	71141.4	64022.8	30093.9	32569.4	46956.7	36540	1.75213	0.014006
O14979	Heterogeneous nuclear ribonucleoprotein D-like	HNRNPDL	O14979	O14979;A0A087WUK2;B4DTA2	HNRNPDL	Heterogeneous nuclear ribonucleoprotein D-like	HNRDL_HUMAN	7	91629	78118.7	93714.2	87820.6	47224.2	40420.8	62844.1	50163	1.7507	0.0102747
O95782	AP-2 complex subunit alpha-1	AP2A1	O95782	O95782;Q8N9K4	AP2A1	AP-2 complex subunit alpha-1	AP2A1_HUMAN	16	42488.9	36291.4	49976.1	42918.8	27430.2	19325.2	27026.1	24593.8	1.7451	0.0182367
Q14141	Septin-6	SEPTIN6	Q14141	Q14141;B1AMS2;B4DPT4;B4DZW0;Q541S4;Q548C9;Q6B514;Q6NT82;A0A7G8YWE2;Q8NFH9;Q8NFI0;Q8NFI1;Q8NFI2	SEPTIN6	Septin-6	SEPT6_HUMAN	2	20439.8	22059.6	24269	22256.1		12603.6	13102.5	12853	1.73158	0.00736657
Q92879	CUGBP Elav-like family member 1	CELF1	Q92879	Q92879;G5EA30;E9PKA1;E9PKU1;E9PQK4;E9PSH0;F5H0D8;F5H4Y5	CELF1	CUGBP Elav-like family member 1	CELF1_HUMAN	1	21394.2	25081.3	28607.4	25027.6	11486.8	12735.6	19155	14459.1	1.73092	0.0286882
P46459	Vesicle-fusing ATPase	NSF	P46459	P46459;A0A384MTI6;B4DH19;I3L0N3;K7EQD6;A0A994J5K9;A0A994J5X2;A0A994J5X9;B4DGR3;B4DSK5;B7Z5J7;B7Z9U2;Q96D47	NSF	Vesicle-fusing ATPase	NSF_HUMAN	15	41175.3	48437.7	51650.5	47087.8	27112.2	22341	32245.6	27232.9	1.72908	0.00924709
P12235	ADP/ATP translocase 1	SLC25A4	P12235	P12235;A0A0S2Z3H3;A0A0S2Z359;A8K787;Q59EP7;V9GYG0	SLC25A4	ADP/ATP translocase 1	ADT1_HUMAN	1	18039.3	15172.9	16160.5	16457.6		8883.85	10258.9	9571.38	1.71946	0.0105135
P00338	L-lactate dehydrogenase A chain	LDHA	P00338	P00338;B4DJI1;V9HWB9	LDHA	L-lactate dehydrogenase A chain	LDHA_HUMAN	28	615479	530941	662001	602807	275919	312814	463536	350756	1.71859	0.0217435
P82979	SAP domain-containing ribonucleoprotein	SARNP	P82979	P82979;F8VZQ9;H0YHG0;Q567R9	SARNP	SAP domain-containing ribonucleoprotein	SARNP_HUMAN	4	54319.8	60083.6	62242.6	58882	43894.9	20319.7	39155.1	34456.6	1.70888	0.032183
O00571	ATP-dependent RNA helicase DDX3X	DDX3X	O00571	O00571;O15523;Q9NQI0;A0A0D9SF53;A0A0D9SFB3;A0A2R8Y4A4;A0A2R8Y645;A0A2R8YCW1;A0A2R8YF78;A0A2R8YFR4;A0A2R8YFS5;A0A2U3TZJ9;F6S8Q4;A0A0D9SG12;A0A2R8Y5G6;A0A2R8Y774;A0A2R8Y7T2;A0A2R8YDH3;A0A2R8YDT5;B4DLU5;B4E010;B5BTY4;D6RCM4;Q59GX6;Q5S4N1;B4E132	DDX3X	ATP-dependent RNA helicase DDX3X	DDX3X_HUMAN	27	82575.1	89870.1	89782.5	87409.2	52126.8	32332.3	69138.4	51199.2	1.70724	0.0293762
Q92888	Rho guanine nucleotide exchange factor 1	ARHGEF1	Q92888	Q92888;A0A8V8TMH9;A0A8V8TP90;M0QZR4;A0A2X0SFA4;A0A8V8TMG9;A0A9L9PYI1;Q8NF33	ARHGEF1	Rho guanine nucleotide exchange factor 1	ARHG1_HUMAN	6	22856.7	25125.6	29880.1	25954.1	9723.02	19740.9	16184.2	15216	1.70571	0.0402555
Q9Y678	Coatomer subunit gamma-1	COPG1	Q9Y678	Q9Y678	COPG1	Coatomer subunit gamma-1	COPG1_HUMAN	19	93826.8	82216.2	104823	93622	51539.9	47501.4	65955.7	54999	1.70225	0.0108998
O75083	WD repeat-containing protein 1	WDR1	O75083	O75083;V9HWG7;A0A8V8TNT7;A0A8V8TNU2;A0A8V8TP22;A0A8V8TP31;A0A8V8TQ69;A0A8V8TQ74;A0A8V8TQK0;B3KXN4;B4DY05;Q53GN4;Q53H17;Q59ER5	WDR1	WD repeat-containing protein 1	WDR1_HUMAN	21	268340	224147	294109	262199	154427	121105	195120	156884	1.67129	0.0235949
Q9H2J4	Phosducin-like protein 3	PDCL3	Q9H2J4	Q9H2J4;B7Z6S0	PDCL3	Phosducin-like protein 3	PDCL3_HUMAN	1	24063.5	24713.4	20975.9	23250.9	11357.2	17137	13352.2	13948.8	1.66688	0.0105138
Q9NZM1	Myoferlin	MYOF	Q9NZM1	Q9NZM1;H0YD14	MYOF	Myoferlin	MYOF_HUMAN	35	83592.2	86632.8	93658.4	87961.1	34473.7	57675.2	66680.5	52943.1	1.66143	0.02522
Q86Y82	Syntaxin-12	STX12	Q86Y82	Q86Y82;Q6LEU0;B0AZT9;B4DSZ1	STX12	Syntaxin-12	STX12_HUMAN	4	49023.4	38159.7	46763.3	44648.8	23387	25451.9	32051.2	26963.4	1.65591	0.0137593
P51452	Dual specificity protein phosphatase 3	DUSP3	P51452	P51452;B5BUI8;K7ES89	DUSP3	Dual specificity protein phosphatase 3	DUS3_HUMAN	6	50692	46315.8	32820.6	43276.1	26716.3	30020.7	22305.4	26347.5	1.64252	0.0438242
Q8TD55	Pleckstrin homology domain-containing family O member 2	PLEKHO2	Q8TD55	Q8TD55	PLEKHO2	Pleckstrin homology domain-containing family O member 2	PKHO2_HUMAN	4	27949.2	24866.7	32776.9	28530.9	18409.8		16413.1	17411.5	1.63863	0.0360026
Q8NFH3	Nucleoporin Nup43	NUP43	Q8NFH3	Q8NFH3;A0PJK4;B3KTT0	NUP43	Nucleoporin Nup43	NUP43_HUMAN	3	36698.7	35315.2	29721.9	33911.9		23842	17619.3	20730.7	1.63584	0.0352057
Q92882	Osteoclast-stimulating factor 1	OSTF1	Q92882	Q92882;A8K646	OSTF1	Osteoclast-stimulating factor 1	OSTF1_HUMAN	7	98590.6	116536	108626	107918	86379.2	46596.5	65265.6	66080.4	1.63312	0.029441
Q8IXB1	DnaJ homolog subfamily C member 10	DNAJC10	Q8IXB1	Q8IXB1;A0A7P0Z431;A0A494C1G5;A0A7P0T9B7;A0A7P0TAQ9;A0A7P0TB22;A0A7P0TB83;A0A7P0TB97;A0A7P0Z4F2;E7EP04;Q6YPB0;Q86XS7	DNAJC10	DnaJ homolog subfamily C member 10	DJC10_HUMAN	3	11078.9	14992.5	15832.9	13968.1	10968.6	7161.88	7555.85	8562.11	1.63139	0.046553
P78371	T-complex protein 1 subunit beta	CCT2	P78371	P78371;V9HW96;F5GWF6;F8VQ14	CCT2	T-complex protein 1 subunit beta	TCPB_HUMAN	29	280681	232736	259612	257676	166372	107384	200198	157985	1.63102	0.0307133
Q9BSJ8	Extended synaptotagmin-1	ESYT1	Q9BSJ8	Q9BSJ8;B3KMV5;B3KY56	ESYT1	Extended synaptotagmin-1	ESYT1_HUMAN	18	51153.2	51323.2	59021.4	53832.6	37810.3	25217.8	37187.2	33405.1	1.61151	0.0135671
P08754	Guanine nucleotide-binding protein G(i) subunit alpha-3	GNAI3	P08754	P08754	GNAI3	Guanine nucleotide-binding protein G(i) subunit alpha-3	GNAI3_HUMAN	12	160716	173478	221689	185294	107844	115550	122614	115336	1.60656	0.0213473
Q14103	Heterogeneous nuclear ribonucleoprotein D0	HNRNPD	Q14103	Q14103;A0A994J440;A0A994J4R1;B4DTC3;B4E0W4;H0Y8G5;H0YA96;Q12771	HNRNPD	Heterogeneous nuclear ribonucleoprotein D0	HNRPD_HUMAN	13	239442	238588	265179	247736	152026	125437	186038	154500	1.60347	0.0089063
Q13685	Angio-associated migratory cell protein	AAMP	Q13685	Q13685;C9JEH3;C9JG97;H7C0R2	AAMP	Angio-associated migratory cell protein	AAMP_HUMAN	1	14132.2	15370.6	10703.1	13402	8232.05	7614.93	9308.17	8385.05	1.59832	0.0275968
P11586	C-1-tetrahydrofolate synthase, cytoplasmic	MTHFD1	P11586	P11586;A0A8V8TKS0;A0A8V8TKT4;A0A8V8TL50;A0A8V8TMA4;B7Z809;F5H2F4;V9GYY3;V9GZ78;A0A494C1T2	MTHFD1	C-1-tetrahydrofolate synthase, cytoplasmic	C1TC_HUMAN	19	54361.2	58129.1	67316.6	59935.6	36541.7	34610.8	41437.7	37530.1	1.597	0.00674647
P31943	Heterogeneous nuclear ribonucleoprotein H	HNRNPH1	P31943	P31943;A0A384MEJ3;G8JLB6;H0YB39	HNRNPH1	Heterogeneous nuclear ribonucleoprotein H	HNRH1_HUMAN	17	213424	183811	165564	187600	126671	89804.7	137583	118020	1.58956	0.0257177
Q9UHD8	Septin-9	SEPTIN9	Q9UHD8	Q9UHD8;A0A0S2Z5A5;A0A0S2Z5W9;A0A6Q8PHC2;K7EIE4;K7EK18;K7EL40;K7EQD7;K7ER52	SEPTIN9	Septin-9	SEPT9_HUMAN	18	83882.6	78862.8	79587.8	80777.7	54272.1	41749.3	56434	50818.5	1.58954	0.00345705
Q9ULV4	Coronin-1C	CORO1C	Q9ULV4	Q9ULV4;B3KN06;B4DMH3;B4E3S0;B7Z9V0;Q53G58;Q59EA2	CORO1C	Coronin-1C	COR1C_HUMAN	14	102256	121446	121498	115067	95402.3	49021.7	74488.6	72970.9	1.57689	0.0472243
O60884	DnaJ homolog subfamily A member 2	DNAJA2	O60884	O60884	DNAJA2	DnaJ homolog subfamily A member 2	DNJA2_HUMAN	8	69429.8	68368.8	63701.5	67166.7	45768.5	31770.5	51056.2	42865.1	1.56693	0.0156146
Q14344	Guanine nucleotide-binding protein subunit alpha-13	GNA13	Q14344	Q14344;B4DWV9	GNA13	Guanine nucleotide-binding protein subunit alpha-13	GNA13_HUMAN	6	372857	354881	422663	383467	185400	240895	312079	246125	1.55802	0.0305497
O00429	Dynamin-1-like protein	DNM1L	O00429	O00429;F8VUJ9;F8VZ52;A0A8V8TQT5;A0A994J3G1;A0A994J3G5;A0A994J3M8;A0A994J402;A0A994J696;A0A994J6A0;A0A994J6L8;B4DYR6;H0YI79;Q32Q67	DNM1L	Dynamin-1-like protein	DNM1L_HUMAN	12	52637.1	61014.3	46246.3	53299.2	32647.7	33403.1	36592.1	34214.3	1.55781	0.012696
O43809	Cleavage and polyadenylation specificity factor subunit 5	NUDT21	O43809	O43809;B2R6U8;Q5HYH5	NUDT21	Cleavage and polyadenylation specificity factor subunit 5	CPSF5_HUMAN	5	52860.6	57670.4	47111.3	52547.4	34817.9	23668.2	42842.1	33776.1	1.55576	0.0415647
P61160	Actin-related protein 2	ACTR2	P61160	P61160;A0A1B0GWD0;A0A1B0GWH0	ACTR2	Actin-related protein 2	ARP2_HUMAN	27	186594	227077	252524	222065	149996	103756	175423	143058	1.55227	0.0498956
P52594	Arf-GAP domain and FG repeat-containing protein 1	AGFG1	P52594	P52594;A0A0S2Z3Y3;A0A0S2Z3Z1;A0A0S2Z444;A0A0S2Z462;B4DHC5;B8ZZY2;C9J2I0	AGFG1	Arf-GAP domain and FG repeat-containing protein 1	AGFG1_HUMAN	5	32582.1	22828.6	30565.8	28658.8	20539.6	14660	20454.9	18551.5	1.54483	0.0466406
Q14558	Phosphoribosyl pyrophosphate synthase-associated protein 1	PRPSAP1	Q14558	Q14558;B4DP31;C9J168	PRPSAP1	Phosphoribosyl pyrophosphate synthase-associated protein 1	KPRA_HUMAN	4	39379.9	53403.5	53860.6	48881.3	31764.1	24929.8	38380.1	31691.3	1.54242	0.0487618
Q16658	Fascin	FSCN1	Q16658	Q16658;A0A384MEG1;B3KTA3	FSCN1	Fascin	FSCN1_HUMAN	22	170769	172360	208275	183801	126834	96695.5	135369	119633	1.53638	0.019367
Q02218	2-oxoglutarate dehydrogenase complex component E1	OGDH	Q02218	Q02218;A0A140VJQ5;B4DF00;C9J4G7;E9PCR7;E9PDF2;A2VCT2;A2VCT3;B4DH65	OGDH	2-oxoglutarate dehydrogenase complex component E1	ODO1_HUMAN	16	58856.7	71238.6	55037.8	61711	39738.6	33443.8	48501	40561.1	1.52143	0.0320848
Q9BR76	Coronin-1B	CORO1B	Q9BR76	Q9BR76;Q9NSK3	CORO1B	Coronin-1B	COR1B_HUMAN	10	59167.5	75316.9	72178.7	68887.7	54427.7	36110.4	45326.3	45288.1	1.5211	0.031078
P63010	AP-2 complex subunit beta	AP2B1	P63010	P63010;A0A087X253;A0A140VJE8;A8K0G3;A8K916;B4DWG4;Q68DI0;A0A087WU93;A0A087WYD1;A0A087WZQ6;B4E261;K7EJ01;Q96EL6	AP2B1	AP-2 complex subunit beta	AP2B1_HUMAN	10	49478	40416.9	44442.9	44779.3	37662.4	24410.5	26311.9	29461.6	1.51992	0.0352636
P42704	Leucine-rich PPR motif-containing protein, mitochondrial	LRPPRC	P42704	P42704;E5KNY5;A0A804HHY9;A0A804HI14;A0A804HIG4;A0A804HIN4;A0A804HJZ1;A0A804HK30;A0A804HKI2;A0A804HKJ0;A0A804HKR3;A0A804HL40;A0A804HLG8	LRPPRC	Leucine-rich PPR motif-containing protein, mitochondrial	LPPRC_HUMAN	13	56689.3	56019.5	62221.2	58310	28031	39625.5	48137	38597.8	1.51071	0.0327252
Q9H4M9	EH domain-containing protein 1	EHD1	Q9H4M9	Q9H4M9;Q9NZN3;B2R5U3;A0A024R571;B4DMV9;B4DR44;B4DTR4;B4DZH9;C9J2Z4;C9JC03;C9JDQ8	EHD1	EH domain-containing protein 1	EHD1_HUMAN	24	66027.1	66242.4	83594.6	71954.7	47592.2	40066.6	55658.1	47772.3	1.5062	0.030315
P26639	Threonine--tRNA ligase 1, cytoplasmic	TARS1	P26639	P26639;B2RDX5;B3KTN2;Q53GX7;Q5M7Z9	TARS1	Threonine--tRNA ligase 1, cytoplasmic	SYTC_HUMAN	12	37193.5	41440.1	44728.7	41120.8	29231	20882.4	32071.8	27395.1	1.50103	0.0265878
Q9Y315	Deoxyribose-phosphate aldolase	DERA	Q9Y315	Q9Y315;E9PML7;B4DKS9;E9PMH9;G3V158	DERA	Deoxyribose-phosphate aldolase	DEOC_HUMAN	9	30418.6	42260.7	39310.9	37330.1	27666.7	20504.9	26484.2	24885.3	1.50009	0.041224
Q16539	Mitogen-activated protein kinase 14	MAPK14	Q16539	Q16539;B4E0K5;L7RSM2;B5TY33;E7EX54	MAPK14	Mitogen-activated protein kinase 14	MK14_HUMAN	9	64949.3	73204.6	84089	74081	48587.8	42284.8	57280.9	49384.5	1.50009	0.0247609
Q15843	NEDD8	NEDD8	Q15843	Q15843	NEDD8	NEDD8	NEDD8_HUMAN	5	258356	258335	184571	233754	390145	303790	373042	355659	0.657242	0.0278161
P30049	ATP synthase subunit delta, mitochondrial	ATP5F1D	P30049	P30049;A0A087WTL3	ATP5F1D	ATP synthase subunit delta, mitochondrial	ATPD_HUMAN	3	159486	183634	118485	153868	220591	267713	219445	235916	0.652216	0.0296555
Q96B45	BLOC-1-related complex subunit 7	BORCS7	Q96B45	Q96B45;A0A0B4J1R7	BORCS7	BLOC-1-related complex subunit 7	BORC7_HUMAN	2	13978.4	20066	19911.2	17985.2	30738.4	27627.3	24749.5	27705.1	0.649166	0.0213501
P54727	UV excision repair protein RAD23 homolog B	RAD23B	P54727	P54725;P54727;A0A494C0B4;A8K1J3;B4DEA3;Q53F10;K7ELW1;K7ENJ0;Q5W0S5	RAD23B	UV excision repair protein RAD23 homolog B	RD23B_HUMAN	15	107817	118233	85272.2	103774	147110	159869	187726	164902	0.629309	0.0166946
P06731	Carcinoembryonic antigen-related cell adhesion molecule 5	CEACAM5	P06731	P06731;A0A024R0K5;M0R3J1;Q53G30;Q8N4D0	CEACAM5	Carcinoembryonic antigen-related cell adhesion molecule 5	CEAM5_HUMAN	1	11862.7	9145.04	9230.58	10079.4		14879.7	17207.8	16043.8	0.628247	0.0256411
P40855	Peroxisomal biogenesis factor 19	PEX19	P40855	P40855;A0A0S2Z497;Q5QNY5;B7Z2P6;B7Z6I5;H0YDY4;H0YJ60	PEX19	Peroxisomal biogenesis factor 19	PEX19_HUMAN	3	38193.5	33572.3	22325.1	31363.6	48948	47241.1	53909.2	50032.8	0.626862	0.021827
P10599	Thioredoxin	TXN	P10599	P10599;H9ZYJ2	TXN	Thioredoxin	THIO_HUMAN	16	1069380	1180530	650058	966656	1332020	1632120	1672440	1.54553e+06	0.625454	0.0405576
O00754	Lysosomal alpha-mannosidase	MAN2B1	O00754	O00754;A8K6A7;B4E0K9;Q59E90	MAN2B1	Lysosomal alpha-mannosidase	MA2B1_HUMAN	15	58923.8	69920.2	49916.7	59586.9	107224	90715.2	88180.2	95373.1	0.624777	0.0125957
P14784	Interleukin-2 receptor subunit beta	IL2RB	P14784	P14784;A0A8V8TMD3;A0A8V8TMD8;A0A8V8TMF6;A0A8V8TNV4;A0A8V8TP62;A0A8W6ANL8;B0QYC0;B0QYC1	IL2RB	Interleukin-2 receptor subunit beta	IL2RB_HUMAN	1	33575.8	29331.9	24833.2	29247	48679.2	55976.8	37566.1	47407.4	0.616929	0.0373398
Q8NCW5	NAD(P)H-hydrate epimerase	NAXE	Q8NCW5	Q8NCW5;B4DP80;A0A7P0TAG8	NAXE	NAD(P)H-hydrate epimerase	NNRE_HUMAN	7	74917.5	74793.1	45157.7	64956.1	120486	104896	94336.3	106573	0.6095	0.0289596
P17050	Alpha-N-acetylgalactosaminidase	NAGA	P17050	P17050	NAGA	Alpha-N-acetylgalactosaminidase	NAGAB_HUMAN	6	29540.3	25596.9	25768.9	26968.7	47422.9	50337.5	35252.2	44337.5	0.608259	0.0223236
P05091	Aldehyde dehydrogenase, mitochondrial	ALDH2	P05091	O94788;P05091;A0A384NPN7;B4DH89;B4YAH7;F8VP50;H0YKL3;H0YMG7;Q53FB6	ALDH2	Aldehyde dehydrogenase, mitochondrial	ALDH2_HUMAN	24	123155	144612	153809	140525	190000	233197	288845	237347	0.592066	0.032108
Q9UGT4	Sushi domain-containing protein 2	SUSD2	Q9UGT4	Q9UGT4;A0A140VJW3	SUSD2	Sushi domain-containing protein 2	SUSD2_HUMAN	15	31105	54312	53964.4	46460.5	70499.5	96411.5	72709.6	79873.5	0.581675	0.0417065
Q13011	Delta(3,5)-Delta(2,4)-dienoyl-CoA isomerase, mitochondrial	ECH1	Q13011	Q13011;A0A384MR44;B4DVS4;M0QZW4;M0R248	ECH1	Delta(3,5)-Delta(2,4)-dienoyl-CoA isomerase, mitochondrial	ECH1_HUMAN	12	78094.9	106217	72475.8	85595.9	116309	146113	180619	147680	0.579603	0.0435419
P07919	Cytochrome b-c1 complex subunit 6, mitochondrial	UQCRH	P07919	P07919;Q567R0	UQCRH	Cytochrome b-c1 complex subunit 6, mitochondrial	QCR6_HUMAN	6	145086	203004	86378.5	144823	244260	266127	239771	250053	0.579169	0.0384761
P52655	Transcription initiation factor IIA subunit 1	GTF2A1	P52655	P52655;J3KNC0	GTF2A1	Transcription initiation factor IIA subunit 1	TF2AA_HUMAN	1	26217	23814.8	19801.4	23277.7	47023.5	37111.4	36499.9	40211.6	0.578881	0.0121291
Q9BS40	Latexin	LXN	Q9BS40	Q9BS40	LXN	Latexin	LXN_HUMAN	2	13033	22323	12281.3	15879.1	27959.9	28698.8	27416.1	28024.9	0.566606	0.020182
P23142	Fibulin-1	FBLN1	P23142	P23142;Q8NBH6	FBLN1	Fibulin-1	FBLN1_HUMAN	31	302376	275791	276306	284824	446209	607748	459486	504481	0.564589	0.0138869
P42785	Lysosomal Pro-X carboxypeptidase	PRCP	P42785	P42785;A0A7P0Z451;A0A7P0TB23;E9PNF7	PRCP	Lysosomal Pro-X carboxypeptidase	PCP_HUMAN	10	51987.4	77861.3	66701.6	65516.8	130801	104324	113476	116200	0.563826	0.00932584
P19256	Lymphocyte function-associated antigen 3	CD58	P19256	P19256;B1AMW1;H0YDI1;Q14748;Q16393;Q9BRW0	CD58	Lymphocyte function-associated antigen 3	LFA3_HUMAN	2	16233.7	15806.5	8521.14	13520.4	26215.4	21700.3	24921.7	24279.1	0.556875	0.0192974
P62979	Ubiquitin-ribosomal protein eS31 fusion protein	RPS27A	P62979	P0CG47;P0CG48;P62979;P62987;Q3MIH3;B2RDW1;Q5RKT7;Q5U5U6;A8K674;B4DV12;F5GXK7;F5GYU3;F5GZ39;F5H265;F5H2Z3;F5H388;F5H6Q2;F5H747;J3QKN0;J3QS39;J3QSA3;J3QTR3;L8B196;L8B4I8;L8B4J3;L8B4M0;L8B4R0;L8B4Z6;M0R1V7;Q49A90;Q59EM9;Q5PY61;Q5UGI3;Q66K58;Q96C32;Q96H31;Q96MH4;Q9UFQ0	RPS27A	Ubiquitin-ribosomal protein eS31 fusion protein	RS27A_HUMAN	16	1767660	2569560	1664060	2.00043e+06	4248260	3237400	3344530	3.61006e+06	0.554125	0.0200191
Q9UBG0	C-type mannose receptor 2	MRC2	Q9UBG0	Q9UBG0	MRC2	C-type mannose receptor 2	MRC2_HUMAN	31	192467	218487	126403	179119	392401	346961	239885	326416	0.548745	0.0495101
A0A024RAJ6	Beta-hexosaminidase	HEXB	A0A024RAJ6	A0A024RAJ6	HEXB	Beta-hexosaminidase	A0A024RAJ6_HUMAN	1	24208.8	14952.4	12082.7	17081.3	30661.3	34360.8	28785.4	31269.2	0.546267	0.0240285
Q6UVK1	Chondroitin sulfate proteoglycan 4	CSPG4	Q6UVK1	Q6UVK1	CSPG4	Chondroitin sulfate proteoglycan 4	CSPG4_HUMAN	7	21045.6	20334.4	16792.9	19391	44464.1	28266.7	34714.4	35815.1	0.541419	0.028308
O00584	Ribonuclease T2	RNASET2	O00584	O00584;A6XND5;D6REQ6;D6RHI9;A0A087WZM2;A0A804HJZ7;A0A804HKZ2	RNASET2	Ribonuclease T2	RNT2_HUMAN	10	40603.7	41744.5	48759.8	43702.7	59423.8	95330.6	88634.9	81129.8	0.538676	0.0297158
O00264	Membrane-associated progesterone receptor component 1	PGRMC1	O00264	O00264;Q6IB11	PGRMC1	Membrane-associated progesterone receptor component 1	PGRC1_HUMAN	8	209040	192069	113938	171682	264810	303807	397834	322150	0.532926	0.0376212
Q13683	Integrin alpha-7	ITGA7	Q13683	Q13683;A0A8I5KSX0;B3KMS6;G3V2C6;H0YJ98;J3KNV4;Q4LE35	ITGA7	Integrin alpha-7	ITA7_HUMAN	5	12433.9	15480.7	7922.56	11945.7	21543.4	23459		22501.2	0.530893	0.0364685
O15382	Branched-chain-amino-acid aminotransferase, mitochondrial	BCAT2	O15382	O15382;B3KSI3;M0QXF9;M0QZ10;M0QZP4;Q53EW7	BCAT2	Branched-chain-amino-acid aminotransferase, mitochondrial	BCAT2_HUMAN	8	13879.8	11186.8	13344.4	12803.7	23037.9	20091	29643.2	24257.4	0.527826	0.017635
P29218	Inositol monophosphatase 1	IMPA1	P29218	P29218;A0A140VJL8;E5RGY4;E5RHE9;E5RIP7;H0YBL1;E5RG94;E5RI82	IMPA1	Inositol monophosphatase 1	IMPA1_HUMAN	2	7547.68	6591.76	9487.07	7875.5	19593.8	12849	12710.6	15051.1	0.52325	0.0416505
O75122	CLIP-associating protein 2	CLASP2	O75122	O75122;A0A0U1RQI6;A0A804HJG7;E3W994;E7ERI8;E7EW49;J3KR49;B3KR06;B4DG03;B4DM73;C9J668;D6RBU8;E7ENG2;Q8NB74	CLASP2	CLIP-associating protein 2	CLAP2_HUMAN	1	103390	108444	68594.6	93476.2	193726	167045		180386	0.518202	0.0195623
Q12860	Contactin-1	CNTN1	Q12860	Q12860	CNTN1	Contactin-1	CNTN1_HUMAN	4	9544.33	9721.47	5962.41	8409.4	15398.7	16140.4	17379.6	16306.2	0.515717	0.00430728
P00352	Aldehyde dehydrogenase 1A1	ALDH1A1	P00352	P00352;B4DDF8;Q59EJ0;Q5SYQ7;Q5SYQ8;Q5SYQ9;V9HVX6;V9HW83	ALDH1A1	Aldehyde dehydrogenase 1A1	AL1A1_HUMAN	18	129211	119144	87255.8	111870	169890	278686	204853	217810	0.513615	0.0371742
P13473	Lysosome-associated membrane glycoprotein 2	LAMP2	P13473	P13473;B4E2S7;B7Z2R9;H0YCG2;A0A9L9PXQ4;B4DF49	LAMP2	Lysosome-associated membrane glycoprotein 2	LAMP2_HUMAN	5	29333.2	33795.7	42227	35118.6	59272.2	61992.8	84204.8	68489.9	0.512756	0.0189118
O15118	NPC intracellular cholesterol transporter 1	NPC1	O15118	O15118;A0A0A8JCD0;A0A0S2A5C8;A0A193DRS0;Q59GR1;B4DIP7;K7EQ23	NPC1	NPC intracellular cholesterol transporter 1	NPC1_HUMAN	2	8350.18		8650.3	8500.24	17614.3		15861.6	16738	0.507842	0.0114494
Q9H0W9	Ester hydrolase C11orf54	C11orf54	Q9H0W9	Q9H0W9;A0A024R3B0;A0A087WT99;A0A1W2PRB8;E9PPB5;E9PQS1;A8K718;E9PJU8	C11orf54	Ester hydrolase C11orf54	CK054_HUMAN	7	22452.5	28919.4	19055.3	23475.7	44709.2	40127	54080.9	46305.7	0.506973	0.0104585
Q9NR28	Diablo IAP-binding mitochondrial protein	DIABLO	Q9NR28	Q9NR28;A0A024RBT2;A0A0S2Z5P6;A0A0S2Z5U7;K7X1S0;Q502X2;Q53HB7	DIABLO	Diablo IAP-binding mitochondrial protein	DBLOH_HUMAN	2	28541.3	20175.2	35647.9	28121.5	57713.9	39992.8	69116.2	55607.6	0.505712	0.0455148
Q12972	Nuclear inhibitor of protein phosphatase 1	PPP1R8	Q12972	Q12972;B4E389;Q561W4	PPP1R8	Nuclear inhibitor of protein phosphatase 1	PP1R8_HUMAN	2	4639.92	9431.81	8140.8	7404.18	16307.8		13914.9	15111.4	0.489975	0.0329804
P04216	Thy-1 membrane glycoprotein	THY1	P04216	P04216;B0YJA4;Q59GA0;E9PIM6;E9PNQ8	THY1	Thy-1 membrane glycoprotein	THY1_HUMAN	8	508390	403013	483734	465046	1219480	929564	701211	950085	0.489478	0.0340549
Q9UBX7	Kallikrein-11	KLK11	Q9UBX7	Q9UBX7;A0A1R3UDR5;M0QZI8	KLK11	Kallikrein-11	KLK11_HUMAN	6	58858.9	87812.8	69597.7	72089.8	131112	184404	134827	150114	0.480233	0.0151534
P21810	Biglycan	BGN	P21810	P21810;A8K7E0;B4DNL4;C9JKG1;Q53FI4;Q53HU6;Q8NAB7;A6NLG9;B4DDN7;B4DDQ2;B4DQD6	BGN	Biglycan	PGS1_HUMAN	37	893550	1321140	747740	987477	2359810	2262820	1563350	2.06199e+06	0.478894	0.0241861
P61457	Pterin-4-alpha-carbinolamine dehydratase	PCBD1	P61457	P61457;Q6FGB3;Q6LEE1	PCBD1	Pterin-4-alpha-carbinolamine dehydratase	PHS_HUMAN	5	106974	108788	66887.3	94216.4	225190	238294	140649	201378	0.467859	0.032984
Q9Y5Z4	Heme-binding protein 2	HEBP2	Q9Y5Z4	Q9Y5Z4;Q05DB4	HEBP2	Heme-binding protein 2	HEBP2_HUMAN	9	248678	254917	150135	217910	458762	527805	421040	469202	0.464427	0.00551929
O95460	Matrilin-4	MATN4	O95460	O95460;A2RRP8;A5D8U1;A6NNA4;B3KQB2	MATN4	Matrilin-4	MATN4_HUMAN	12	49747.9	69783.5	52054.6	57195.3	145833	149140	77822.8	124265	0.460268	0.049592
P00441	Superoxide dismutase [Cu-Zn]	SOD1	P00441	P00441;V9HWC9;H7BYH4	SOD1	Superoxide dismutase [Cu-Zn]	SODC_HUMAN	14	318169	318706	180473	272449	605464	774896	462463	614274	0.44353	0.0279607
O95980	Reversion-inducing cysteine-rich protein with Kazal motifs	RECK	O95980	O95980;Q6P9E2;A8K9D8;B2RCE6	RECK	Reversion-inducing cysteine-rich protein with Kazal motifs	RECK_HUMAN	10	7599.39	7949.28	7492.25	7680.31	14112.9	24222.3	14981.9	17772.4	0.432149	0.0356266
P15954	Cytochrome c oxidase subunit 7C, mitochondrial	COX7C	P15954	P15954;D6R9Z7;Q71U45	COX7C	Cytochrome c oxidase subunit 7C, mitochondrial	COX7C_HUMAN	1	38833.4	23535.5	20073.5	27480.8		54363.6	75722.3	65042.9	0.422502	0.0410174
P07686	Beta-hexosaminidase subunit beta	HEXB	P07686	P07686;A0A024RAJ6	HEXB	Beta-hexosaminidase subunit beta	HEXB_HUMAN	22	119029	129250	78223	108834	240894	342526	190681	258034	0.421782	0.034383
Q16769	Glutaminyl-peptide cyclotransferase	QPCT	Q16769	Q16769;A0A3B3IUD5	QPCT	Glutaminyl-peptide cyclotransferase	QPCT_HUMAN	5	19382	50573.5	28263.9	32739.8	99430.1	62270.6	73091	78263.9	0.418326	0.0342589
Q13510	Acid ceramidase	ASAH1	Q13510	Q13510;A0A1B0GTM3;A0A1B0GTZ5;A0A1B0GUA4;A0A1B0GUE3;A0A1B0GUG1;A0A1B0GUH5;A0A1B0GW68;A8K0B6;E7EMM4;Q53H01;A0A1B0GTP7;A0A1B0GUW4;A0A1B0GV06;B3KUZ6	ASAH1	Acid ceramidase	ASAH1_HUMAN	24	136053	150327	112198	132859	301681	255122	404057	320287	0.414814	0.0144844
Q9NQ38	Serine protease inhibitor Kazal-type 5	SPINK5	Q9NQ38	Q9NQ38;B4DRW4;B4DWS3;E7EWP9	SPINK5	Serine protease inhibitor Kazal-type 5	ISK5_HUMAN	33	79384.4	107162	69468.7	85338.4	228806	156620	246121	210516	0.405378	0.0134399
Q9Y680	Peptidyl-prolyl cis-trans isomerase FKBP7	FKBP7	Q9Y680	Q9Y680;A0A8I5KRR8;B4DRE2;H7BZJ4	FKBP7	Peptidyl-prolyl cis-trans isomerase FKBP7	FKBP7_HUMAN	4	5281.5	7310.69	10004.4	7532.2	19890.6	22087.4	13808.2	18595.4	0.405057	0.017382
O00115	Deoxyribonuclease-2-alpha	DNASE2	O00115	O00115;A0A8V8TNK3;B3KQS9;K7ENE5;C0LQF2	DNASE2	Deoxyribonuclease-2-alpha	DNS2A_HUMAN	5	57360.7	64248.1	66552.8	62720.5	181643	145659	145602	157635	0.397885	0.00152646
P50238	Cysteine-rich protein 1	CRIP1	P50238	P50238;H3BRQ4;K4DIB9	CRIP1	Cysteine-rich protein 1	CRIP1_HUMAN	7	212744	471417	175515	286559	877286	797808	576158	750417	0.381866	0.023142
O95969	Secretoglobin family 1D member 2	SCGB1D2	O95969	O95969	SCGB1D2	Secretoglobin family 1D member 2	SG1D2_HUMAN	3	34385.6	46317.1	9835.06	30179.3	90632.8	80050.3		85341.6	0.353629	0.0314273
P11279	Lysosome-associated membrane glycoprotein 1	LAMP1	P11279	P11279;B3KRY3	LAMP1	Lysosome-associated membrane glycoprotein 1	LAMP1_HUMAN	14	129204	170496	132321	144007	352122	460285	416226	409544	0.351627	0.00146562
Q01459	Di-N-acetylchitobiase	CTBS	Q01459	Q01459;B2RBF5;B3KQS3;B4DQ98	CTBS	Di-N-acetylchitobiase	DIAC_HUMAN	8	13385	23969.6	28470.2	21941.6	72702.2	46245.5	71450.5	63466.1	0.345722	0.012878
Q9Y2E5	Epididymis-specific alpha-mannosidase	MAN2B2	Q9Y2E5	Q9Y2E5;A0A384NYH9;H0YA68;Q4VC00	MAN2B2	Epididymis-specific alpha-mannosidase	MA2B2_HUMAN	6	9925.85	15128.8	11482.8	12179.1	37391.1	35476.3	39480.5	37449.3	0.325217	0.000195331
Q8NEX9	Short-chain dehydrogenase/reductase family 9C member 7	SDR9C7	Q8NEX9	Q8NEX9	SDR9C7	Short-chain dehydrogenase/reductase family 9C member 7	DR9C7_HUMAN	5	18228.1	23789.9	21644.5	21220.8	82336.7	57486.3	59556.2	66459.7	0.319304	0.00509492
P20933	N(4)-(beta-N-acetylglucosaminyl)-L-asparaginase	AGA	P20933	P20933	AGA	N(4)-(beta-N-acetylglucosaminyl)-L-asparaginase	ASPG_HUMAN	9	59876	99123.5	54199.8	71066.4	270203	174651	234094	226316	0.314014	0.00764715
P22304	Iduronate 2-sulfatase	IDS	P22304	P22304;B3KWA1;B4DGD7	IDS	Iduronate 2-sulfatase	IDS_HUMAN	4	14483	40648.6		27565.8	107856	74583.5	94395.8	92278.4	0.298724	0.0264717
Q9Y337	Kallikrein-5	KLK5	Q9Y337	Q9Y337;A0A2I2MP48;A0A2I2MP49;M0QXX2;Q53F68;Q8IU55	KLK5	Kallikrein-5	KLK5_HUMAN	13	32340.5	49061	19489.5	33630.3	86345.1	85545.4	167352	113081	0.297401	0.0492037
P25311	Zinc-alpha-2-glycoprotein	AZGP1	P25311	P25311;A0A140VK00;A0JLQ0;C9JEV0	AZGP1	Zinc-alpha-2-glycoprotein	ZA2G_HUMAN	31	155698	314539	175790	215342	1238550	578962	676515	831342	0.25903	0.0435804
O75635	Serpin B7	SERPINB7	O75635	O75635;A8K3Q8;A8K4B1;Q6MZG5	SERPINB7	Serpin B7	SPB7_HUMAN	20	32929	86634.9	31821.8	50461.9	175987	147123	301537	208216	0.242354	0.0358903
O60911	Cathepsin L2	CTSV	O60911	O60911;A0A7P0T983;A0A7P0Z415;B2R717	CTSV	Cathepsin L2	CATL2_HUMAN	22	75250.9	120217	64936.1	86801.3	445137	174069	471352	363519	0.238781	0.045623
P17900	Ganglioside GM2 activator	GM2A	P17900	P17900;B4DQM5;E5RJD0;H0YBY3;Q14427	GM2A	Ganglioside GM2 activator	SAP3_HUMAN	10	207106	193489	105095	168563	981475	596835	604522	727611	0.231667	0.0129476
Q8IW75	Serpin A12	SERPINA12	Q8IW75	Q8IW75	SERPINA12	Serpin A12	SPA12_HUMAN	21	23655.3	77877.6	19887.8	40473.6	169426	112823	252427	178225	0.227092	0.0367691
Q4FEB3	Chymase 1 preproprotein transcript E (Fragment)	CMA1	Q4FEB3	Q4FEB3	CMA1	Chymase 1 preproprotein transcript E (Fragment)	Q4FEB3_HUMAN	1		160113	21082	90597.5		461040	413538	437289	0.20718	0.0420841
Q86TM8	TPSAB1 protein	TPSAB1	Q86TM8;Q86UA5	Q86TM8;Q86UA5	TPSAB1	TPSAB1 protein	Q86TM8_HUMAN;Q86UA5_HUMAN	6		588911	92465.5	340688		1887620	1677470	1782545	0.191125	0.0332166
Q6NUJ1	Proactivator polypeptide-like 1	PSAPL1	Q6NUJ1	Q6NUJ1	PSAPL1	Proactivator polypeptide-like 1	SAPL1_HUMAN	20	25406.5	33320.4	7762.74	22163.2	192121	101213	250821	181385	0.122189	0.0226641

## Sheet: Table S2
Table S2: Complete list of Kyoto Encyclopedia of Genes and Genomes (KEGG) pathways of dysregulated proteins in this study.
Map_ID	Map_Name	Test	TestAll	Ref	RefAll	Test_per	Ref_per	Test_Seq	Ref_Seq	Over_Under	P value	FDR	richFactor
hsa04142	Lysosome	15	323	68	4113	0.04644	0.016533	A0A024RAJ6 O00115 O00754 O15118 O60911 P07686 P11279 P13473 P17050 P17900 P20933 P22304 P25774 Q13510 Q6NUJ1	A0A024RAJ6 O00115 O00203 O00754 O14617 O14773 O15118 O43747 O60911 O75503 P04062 P04066 P06280 P06865 P07339 P07602 P07686 P07711 P07858 P08236 P08311 P08962 P09496 P09497 P09668 P10253 P10619 P11117 P11279 P11717 P13473 P13686 P15289 P15586 P16278 P17050 P17405 P17900 P20645 P20933 P22304 P25774 P34810 P35475 P38571 P43235 P50897 P51688 P53634 P54802 P54803 P61421 P61966 Q00610 Q10567 Q13488 Q13…	over	0.000183695	0.0468422	0.220588
hsa00511	Other glycan degradation	5	323	10	4113	0.01548	0.002431	A0A024RAJ6 O00754 P07686 P20933 Q9Y2E5	A0A024RAJ6 O00754 P04062 P04066 P06865 P07686 P16278 P20933 Q99519 Q9Y2E5	over	0.000524692	0.0668982	0.5
hsa00600	Sphingolipid metabolism	6	323	17	4113	0.018576	0.004133	A0A024RAJ6 P07686 P17900 Q13510 Q6NUJ1 Q8IU89	A0A024RAJ6 O14495 P04062 P06280 P06865 P07602 P07686 P15289 P16278 P17405 P17900 P54803 Q13510 Q6NUJ1 Q8IU89 Q99519 Q9HA82	over	0.00131642	0.111896	0.352941
hsa00670	One carbon pool by folate	4	323	9	4113	0.012384	0.002188	P11586 P13995 P34897 P42898	O75891 P11586 P13995 P22102 P31939 P34896 P34897 P42898 Q3SY69	over	0.00342449	0.217179	0.444444
hsa00603	Glycosphingolipid biosynthesis - globo and isoglobo series	3	323	5	4113	0.009288	0.001216	A0A024RAJ6 P07686 P17050	A0A024RAJ6 P06280 P06865 P07686 P17050	over	0.00425842	0.217179	0.6
hsa04657	IL-17 signaling pathway	6	323	22	4113	0.018576	0.005349	P05109 P06702 P10145 P14780 Q16539 Q86SG5	O15264 P03956 P05109 P06702 P07900 P08238 P10145 P14625 P14780 P19838 P27361 P28482 P31151 P42574 P80188 Q04206 Q07955 Q13158 Q15628 Q15717 Q16539 Q86SG5	over	0.00567268	0.241089	0.272727
hsa04022	cGMP-PKG signaling pathway	9	323	45	4113	0.027864	0.010941	O76074 P05141 P08754 P12235 P16615 P20020 P50552 Q14344 Q93084	O14974 O75116 O76074 P01042 P04899 P05023 P05026 P05141 P08754 P0DP23 P12235 P12236 P16220 P16298 P16615 P20020 P23634 P24844 P27361 P27482 P28482 P29992 P31749 P31751 P36507 P36873 P45880 P48454 P50148 P50552 P54709 P61586 P62136 P62140 P63096 P63098 P78347 Q02750 Q08209 Q14344 Q14573 Q15746 Q93084 Q9NZT1 Q9Y277	over	0.00716775	0.261111	0.2
hsa04060	Cytokine-cytokine receptor interaction	4	323	15	4113	0.012384	0.003647	O75888 P10145 P14784 Q9NZH6	O00585 O75888 P02775 P02776 P10145 P14784 P15248 P18510 P26992 P48061 P55774 Q14005 Q14116 Q16627 Q9NZH6	over	0.025455	0.692415	0.266667
hsa04530	Tight junction	9	323	56	4113	0.027864	0.013615	P12814 P14317 P26038 P42768 P50552 P61158 P61160 Q92930 Q92974	O14745 O14950 O15143 O15144 O15145 O15511 O43707 O75116 O95832 P05556 P06126 P0DPH7 P12004 P12814 P14317 P15311 P16989 P17612 P22694 P24844 P26038 P30153 P34932 P35241 P35579 P35580 P35749 P42768 P50552 P59998 P60660 P60709 P60953 P61006 P61158 P61160 P61586 P62834 P63000 P63151 P67775 P68366 Q07157 Q12959 Q14160 Q14247 Q68EM7 Q7Z406 Q92747 Q92930 Q92974 Q96PU5 Q9BPX5 Q9BQE3 Q9Y3L5 Q9Y624	over	0.0286565	0.692415	0.160714
hsa05152	Tuberculosis	10	323	66	4113	0.03096	0.016047	P04233 P11279 P13473 P25208 P25774 P30273 P42224 Q16539 Q9NNX6 Q9UBG0	O15264 O60603 P01024 P01903 P01909 P01911 P04233 P04440 P05107 P07339 P08571 P08637 P0DP23 P10809 P11215 P11279 P13473 P16220 P16298 P18428 P19838 P20339 P22897 P25208 P25774 P27361 P27482 P28482 P30273 P31146 P31749 P31751 P33241 P38646 P42224 P42574 P43405 P48454 P49913 P51148 P51149 P55957 P61020 P61421 P61586 P63098 P99999 Q04206 Q07812 Q08209 Q13158 Q13488 Q13555 Q13557 Q13952 Q14116 Q15075 …	over	0.0314634	0.692415	0.151515
hsa00604	Glycosphingolipid biosynthesis - ganglio series	2	323	4	4113	0.006192	0.000973	A0A024RAJ6 P07686	A0A024RAJ6 P06865 P07686 P16278	over	0.0331683	0.692415	0.5
hsa01240	Biosynthesis of cofactors	9	323	58	4113	0.027864	0.014102	O15382 P05091 P05186 P11586 P13995 P17812 P22830 P30520 P34897	O15305 O15382 O60701 P00568 P05091 P05186 P06132 P07814 P08236 P08397 P09622 P10746 P11172 P11586 P13716 P13995 P14550 P15531 P15559 P17812 P22392 P22830 P27144 P27708 P30085 P30520 P30566 P30837 P31153 P34896 P34897 P34949 P35270 P46952 P48506 P48637 P51648 P54819 Q13057 Q13232 Q15274 Q16851 Q4G0N4 Q6XQN6 Q8N0U8 Q8NFF5 Q8TC12 Q92820 Q96IJ6 Q9HAB8 Q9HAN9 Q9NVS9 Q9NZL9 Q9UIJ7 Q9Y2Z9 Q9Y5P6 Q9Y617 …	over	0.0351161	0.692415	0.155172
hsa00770	Pantothenate and CoA biosynthesis	3	323	10	4113	0.009288	0.002431	O15382 O95498 P05091	O14638 O15382 O95497 O95498 P05091 P30837 P51648 Q13057 Q9HAB8 Q9NRN7	over	0.0380149	0.692415	0.3
hsa04061	Viral protein interaction with cytokine and cytokine receptor	3	323	10	4113	0.009288	0.002431	P10145 P14784 Q9NZH6	O00585 P02775 P02776 P10145 P14784 P48061 P55774 Q14116 Q16627 Q9NZH6	over	0.0380149	0.692415	0.3
hsa00531	Glycosaminoglycan degradation	3	323	11	4113	0.009288	0.002674	A0A024RAJ6 P07686 P22304	A0A024RAJ6 P06865 P07686 P08236 P15586 P16278 P22304 P35475 P51688 P54802 Q9Y251	over	0.0493063	0.737684	0.272727
hsa00790	Folate biosynthesis	3	323	11	4113	0.009288	0.002674	O60218 P05186 P61457	C9JRZ8 O60218 P05186 P09417 P15121 P16152 P35270 P42330 P61457 Q92820 Q9H0N5	over	0.0493063	0.737684	0.272727
hsa04721	Synaptic vesicle cycle	5	323	27	4113	0.01548	0.006565	O95782 P21283 P46459 P63010 Q96CW1	O75348 O94973 O95782 P09496 P09497 P20336 P21281 P21283 P36543 P38606 P46459 P50570 P53680 P54920 P61421 P63010 P63027 Q00610 Q05193 Q13277 Q13488 Q16864 Q93050 Q96CW1 Q9UI12 Q9UQ16 Q9Y5K8	over	0.0557535	0.737684	0.185185
hsa04630	JAK-STAT signaling pathway	4	323	19	4113	0.012384	0.004619	P14784 P42224 P42229 Q06278	P00533 P01112 P09619 P14784 P15248 P26992 P29350 P31749 P31751 P40763 P42224 P42226 P42229 P42345 P62993 Q06124 Q06278 Q13642 Q92783	over	0.0564499	0.737684	0.210526
hsa04658	Th1 and Th2 cell differentiation	4	323	19	4113	0.012384	0.004619	P14784 P42224 P42229 Q16539	O15264 P01903 P01909 P01911 P04440 P14784 P16298 P19838 P27361 P28482 P42224 P42226 P42229 P48454 P63098 Q04206 Q04721 Q08209 Q16539	over	0.0564499	0.737684	0.210526
hsa04146	Peroxisome	5	323	28	4113	0.01548	0.006808	O00116 P00441 P04179 P40855 Q13011	O00116 O75381 O75521 O75874 P00441 P04040 P04179 P09110 P22307 P28288 P30044 P33121 P34913 P35914 P40855 P48735 P51659 Q03426 Q06830 Q13011 Q15067 Q96K12 Q99424 Q9BTZ2 Q9BY49 Q9UJ83 Q9Y2Q3 Q9Y6I8	over	0.0636967	0.737684	0.178571
hsa04071	Sphingolipid signaling pathway	6	323	37	4113	0.018576	0.008996	P08754 P30273 Q13510 Q14344 Q16539 Q8IU89	O15264 O75116 P01042 P01111 P01112 P01116 P04899 P07339 P08754 P15153 P17252 P17405 P19838 P27361 P28482 P30153 P30273 P31749 P31751 P36507 P50148 P55957 P61586 P63000 P63096 P63151 P67775 Q02750 Q04206 Q07812 Q13510 Q14344 Q14738 Q15628 Q16539 Q8IU89 Q9HA82	over	0.0657081	0.737684	0.162162
hsa04622	RIG-I-like receptor signaling pathway	3	323	13	4113	0.009288	0.003161	O00571 P10145 Q16539	O00571 O15264 P05161 P10145 P19838 P55265 Q04206 Q13158 Q13526 Q14258 Q15628 Q16539 Q3LXA3	over	0.0761075	0.737684	0.230769
hsa04670	Leukocyte transendothelial migration	7	323	48	4113	0.021672	0.01167	P04216 P08754 P12814 P14780 P26038 P50552 Q16539	O14950 O15264 O43707 O60716 O75116 O95832 P04216 P04839 P04899 P05107 P05362 P05556 P08253 P08754 P11215 P12814 P13498 P14209 P14598 P14780 P15153 P15311 P15498 P16284 P16885 P17252 P18206 P19878 P24844 P26038 P35221 P35222 P48061 P49023 P50552 P60709 P60953 P61586 P62834 P63000 P63096 Q05397 Q06124 Q15080 Q16539 Q8TCZ2 Q96FS4 Q9Y624	over	0.0784377	0.737684	0.145833
hsa00290	Valine, leucine and isoleucine biosynthesis	1	323	1	4113	0.003096	0.000243	O15382	O15382	over	0.0785315	0.737684	1
hsa03260	Virion - Human immunodeficiency virus	1	323	1	4113	0.003096	0.000243	Q9NNX6	Q9NNX6	over	0.0785315	0.737684	1
hsa03264	Virion - Flavivirus	1	323	1	4113	0.003096	0.000243	Q9NNX6	Q9NNX6	over	0.0785315	0.737684	1
hsa03265	Virion - Ebolavirus and Lyssavirus	1	323	1	4113	0.003096	0.000243	O15118	O15118	over	0.0785315	0.737684	1
hsa05161	Hepatitis B	6	323	39	4113	0.018576	0.009482	O00571 P10145 P14780 P42224 P42229 Q16539	O00571 O15264 O60603 P01111 P01112 P01116 P10145 P12004 P14780 P16220 P17252 P19838 P27348 P27361 P28482 P31749 P31751 P31946 P36507 P40763 P42224 P42226 P42229 P42574 P45985 P55957 P62993 P63104 P98160 P99999 Q02750 Q04206 Q07812 Q13158 Q15904 Q16531 Q16539 Q92466 Q9Y277	over	0.0810006	0.737684	0.153846
hsa05131	Shigellosis	11	323	89	4113	0.034056	0.021639	P10145 P12814 P14317 P61158 P61160 P62979 Q14141 Q16539 Q92974 Q9UHD8 Q9Y490	A6NCE7 O14950 O15143 O15144 O15145 O15264 O15511 O43707 O60610 O75116 O75582 P00533 P01024 P04632 P05556 P07384 P07737 P08571 P08648 P10145 P12814 P14317 P16070 P16885 P17655 P18206 P19367 P19838 P20810 P24844 P27361 P28482 P29466 P31749 P31751 P35080 P42345 P46108 P46109 P49023 P49662 P51178 P52790 P59998 P60709 P60953 P61088 P61158 P61160 P61586 P62330 P62979 P63000 P63208 P68431 P99999 Q01081 …	over	0.0867368	0.753946	0.123596
hsa04961	Endocrine and other factor-regulated calcium reabsorption	4	323	22	4113	0.012384	0.005349	O95782 P20020 P63010 Q96CW1	O94973 O95782 P05023 P05026 P09496 P09497 P17252 P17612 P20020 P22694 P23634 P50148 P50570 P53680 P54709 P62491 P63010 P63092 Q00610 Q05193 Q96CW1 Q9UQ16	over	0.0886995	0.753946	0.181818
hsa05162	Measles	5	323	32	4113	0.01548	0.00778	P14784 P26038 P42224 P42229 Q9NNX6	O15372 O60603 P05198 P0DMV8 P11142 P14784 P17066 P19525 P19784 P19838 P20591 P20592 P26038 P31749 P31751 P40763 P42224 P42229 P42574 P51151 P55265 P55957 P63244 P67870 P68400 P99999 Q00534 Q04206 Q07812 Q13158 Q15628 Q9NNX6	over	0.101406	0.834147	0.15625
hsa04217	Necroptosis	7	323	52	4113	0.021672	0.012643	O00429 P05141 P06737 P11216 P12235 P42224 P42229	O00429 O43633 O75351 O75367 O95831 P00367 P02792 P02794 P04839 P05141 P06737 P07384 P07900 P08238 P09429 P09874 P0C0S5 P0C0S8 P11216 P11217 P12235 P12236 P15104 P17405 P17655 P19525 P29466 P40763 P42224 P42226 P42229 P45880 P47712 P55957 P62937 Q07812 Q08752 Q13158 Q13555 Q13557 Q15628 Q7LBR1 Q8IUE6 Q9BY43 Q9H444 Q9HD42 Q9NZZ3 Q9P0M6 Q9ULZ3 Q9UN37 Q9Y277 Q9Y3E7	over	0.109584	0.87325	0.134615
hsa04659	Th17 cell differentiation	4	323	24	4113	0.012384	0.005835	P14784 P42224 P42229 Q16539	O15264 P01903 P01909 P01911 P04440 P07900 P08238 P14784 P16298 P19793 P19838 P27361 P28482 P28702 P40763 P42224 P42226 P42229 P42345 P48454 P63098 Q04206 Q08209 Q16539	over	0.114156	0.877393	0.166667
hsa04621	NOD-like receptor signaling pathway	6	323	43	4113	0.018576	0.010455	O00429 P10145 P10599 P42224 P57764 Q16539	A6NCE7 O00429 O15264 P04839 P07858 P07900 P08238 P10145 P10599 P12838 P13498 P19838 P27361 P28482 P29466 P32455 P32456 P42224 P43490 P45880 P46736 P49662 P49913 P57730 P57764 P59666 P60520 P61586 P62258 Q04206 Q12888 Q13158 Q14116 Q14573 Q15654 Q16539 Q16666 Q99572 Q9H492 Q9ULZ3 Q9Y277 Q9Y2Z0 Q9Y4H4	over	0.116986	0.877393	0.139535
hsa04380	Osteoclast differentiation	5	323	34	4113	0.01548	0.008266	O75023 P16615 P42224 Q16539 Q93084	O15264 O75023 P05106 P08637 P13498 P13686 P14598 P16220 P16298 P16615 P16885 P19838 P19878 P27361 P28482 P31749 P31751 P42224 P43235 P43405 P48454 P62993 P63000 P63098 P78324 Q00653 Q02750 Q04206 Q08209 Q14192 Q14573 Q15080 Q16539 Q93084	over	0.123642	0.900821	0.147059
hsa04611	Platelet activation	7	323	55	4113	0.021672	0.013372	P08754 P30273 P50552 Q14344 Q16539 Q92888 Q9Y490	O00161 O14950 O14974 O15264 O75116 P00734 P02452 P02461 P02671 P02675 P02679 P04275 P04899 P05106 P05556 P07948 P08123 P08514 P08754 P14770 P16885 P17301 P17612 P22694 P23219 P24557 P27361 P28482 P30273 P31749 P31751 P36873 P43405 P47712 P50148 P50552 P60709 P61586 P62136 P62140 P62834 P63092 P63096 Q13586 Q14344 Q14573 Q15746 Q16539 Q7Z5R6 Q86UX7 Q92888 Q9BV40 Q9HCN6 Q9Y490 Q9Y4G6	over	0.136671	0.968084	0.127273
hsa00830	Retinol metabolism	2	323	9	4113	0.006192	0.002188	P00352 Q06278	P00325 P00326 P00352 P11766 Q06278 Q6E213 Q6NUM9 Q8TC12 Q9BTZ2	over	0.153475	0.992878	0.222222
hsa01523	Antifolate resistance	2	323	9	4113	0.006192	0.002188	P34897 P42898	P14207 P19838 P22102 P31939 P34896 P34897 P42898 Q04206 Q92820	over	0.153475	0.992878	0.222222
hsa04020	Calcium signaling pathway	5	323	37	4113	0.01548	0.008996	P05141 P12235 P16615 P20020 Q93084	P00533 P05141 P09038 P09619 P0DP23 P12235 P12236 P16298 P16615 P16885 P17252 P17612 P20020 P22694 P23634 P26927 P27482 P29992 P45880 P48454 P50148 P51178 P63092 P63098 Q08209 Q12797 Q13555 Q13557 Q13586 Q14012 Q14573 Q15746 Q8IU85 Q93084 Q99572 Q9NZT1 Q9Y277	over	0.16077	0.992878	0.135135
hsa04623	Cytosolic DNA-sensing pathway	3	323	18	4113	0.009288	0.004376	O00115 P57764 Q9Y3Z3	O00115 O15160 P19838 P29466 P42574 P52434 P55210 P55265 P57764 P62875 Q04206 Q13158 Q13283 Q14116 Q15365 Q16666 Q9ULZ3 Q9Y3Z3	over	0.163301	0.992878	0.166667
hsa04917	Prolactin signaling pathway	3	323	18	4113	0.009288	0.004376	P42224 P42229 Q16539	O15264 P01111 P01112 P01116 P05814 P19838 P27361 P28482 P31749 P31751 P36507 P40763 P42224 P42229 P62993 Q02750 Q04206 Q16539	over	0.163301	0.992878	0.166667
hsa05135	Yersinia infection	6	323	50	4113	0.018576	0.012157	P10145 P42768 P61158 P61160 Q16539 Q92888	O15143 O15144 O15145 O15264 O15511 O43516 O75116 P02751 P05556 P08648 P10145 P15153 P15498 P19838 P27361 P28482 P29466 P31749 P31751 P36507 P42768 P45985 P46108 P46109 P49023 P50148 P51812 P59998 P60709 P60953 P61158 P61160 P61586 P62330 P63000 P84095 Q02750 Q04206 Q05397 Q14116 Q14161 Q15418 Q16539 Q92556 Q92747 Q92888 Q9BPX5 Q9ULZ3 Q9UQB8 Q9Y6W5	over	0.19545	0.992878	0.12
hsa00010	Glycolysis / Gluconeogenesis	5	323	40	4113	0.01548	0.009725	P00338 P05091 P07205 P14618 Q9BRR6	P00325 P00326 P00338 P00558 P04075 P04406 P05091 P06733 P06744 P07195 P07205 P07738 P08237 P08559 P09104 P09467 P09622 P09972 P10515 P11177 P11766 P14550 P14618 P17858 P18669 P19367 P30837 P30838 P36871 P49189 P49419 P51648 P52790 P60174 Q01813 Q16822 Q96C23 Q96G03 Q9BRR6 Q9NR19	over	0.201791	0.992878	0.125
hsa04620	Toll-like receptor signaling pathway	3	323	20	4113	0.009288	0.004863	P10145 P42224 Q16539	O15264 O60603 P08571 P10145 P18428 P19838 P27361 P28482 P31749 P31751 P36507 P42224 P43235 P45985 P63000 Q02750 Q04206 Q13158 Q16539 Q9H0E2	over	0.203977	0.992878	0.15
hsa04914	Progesterone-mediated oocyte maturation	3	323	20	4113	0.009288	0.004863	O94804 P08754 Q16539	O15264 O94804 P01116 P04899 P07900 P08238 P08754 P17612 P22694 P27361 P28482 P31749 P31751 P51812 P63096 Q02750 Q15418 Q16539 Q8NHZ8 Q9BS18	over	0.203977	0.992878	0.15
hsa04261	Adrenergic signaling in cardiomyocytes	5	323	41	4113	0.01548	0.009968	P08754 P16615 P20020 Q16539 Q93084	O15264 O75582 P04899 P05023 P05026 P06753 P07951 P08754 P09493 P0DP23 P16220 P16615 P17252 P17612 P19634 P20020 P22694 P23634 P27361 P27482 P28482 P30153 P31749 P31751 P36873 P50148 P54289 P54709 P62136 P62140 P63092 P63096 P63151 P67775 P67936 Q13555 Q13557 Q14738 Q16539 Q93084 Q9NZT1	over	0.216191	0.992878	0.121951
hsa00750	Vitamin B6 metabolism	1	323	3	4113	0.003096	0.000729	Q06278	Q06278 Q9NVS9 Q9Y617	over	0.217626	0.992878	0.333333
hsa00310	Lysine degradation	3	323	21	4113	0.009288	0.005106	O14686 P05091 Q02809	O14686 O60568 O75936 P05091 P09622 P24752 P30084 P30837 P36957 P40939 P49189 P49419 P51648 Q02809 Q16836 Q8IUZ5 Q8NBJ5 Q8WTS6 Q92947 Q9BWD1 Q9NVH6	over	0.225119	0.992878	0.142857
hsa04668	TNF signaling pathway	3	323	21	4113	0.009288	0.005106	O00429 P14780 Q16539	O00429 O15264 O75582 P05362 P14780 P16220 P19838 P27361 P28482 P31749 P31751 P42574 P45985 P50281 P55210 Q02750 Q04206 Q13158 Q15628 Q16539 Q96J02	over	0.225119	0.992878	0.142857
hsa05130	Pathogenic Escherichia coli infection	9	323	86	4113	0.027864	0.020909	P10145 P14317 P61158 P61160 Q12965 Q14344 Q16539 Q92888 Q92974	B0I1T2 O00159 O14745 O15143 O15144 O15145 O15264 O15511 O43516 O43795 O75116 O94832 O94855 O95487 O95832 P00734 P04350 P04406 P05556 P07437 P0DPH7 P10145 P14317 P15311 P16333 P19338 P19838 P23396 P27361 P28482 P29350 P29466 P35579 P35580 P35749 P42574 P49662 P49755 P53992 P55061 P55160 P55210 P59998 P60709 P60953 P61158 P61160 P61586 P62330 P62820 P63000 P68366 P68371 P99999 Q04206 Q06124 Q07157 …	over	0.231029	0.992878	0.104651
hsa04260	Cardiac muscle contraction	4	323	32	4113	0.012384	0.00778	P07919 P15954 P16615 Q93084	O14949 O14957 P00403 P00414 P05023 P05026 P06753 P07919 P07951 P08574 P09493 P09669 P10606 P12074 P13073 P14406 P14854 P14927 P15954 P16615 P19634 P20674 P22695 P31930 P47985 P54289 P54709 P67936 Q12797 Q92581 Q93084 Q9UDW1	over	0.240222	0.992878	0.125
hsa04625	C-type lectin receptor signaling pathway	4	323	32	4113	0.012384	0.00778	P30273 P42224 Q16539 Q9NNX6	O15264 P01111 P01112 P01116 P0DP23 P10301 P16298 P16885 P19838 P27361 P27482 P28482 P29466 P30273 P31749 P31751 P33241 P42224 P43405 P48454 P61586 P62070 P63098 Q00653 Q04206 Q06124 Q08209 Q14573 Q16539 Q9NNX6 Q9NZT1 Q9ULZ3	over	0.240222	0.992878	0.125
hsa04933	AGE-RAGE signaling pathway in diabetic complications	4	323	32	4113	0.012384	0.00778	P10145 P42224 P42229 Q16539	O15264 O60610 P01111 P01112 P01116 P02452 P02461 P02462 P02751 P04839 P05362 P08123 P08253 P08572 P10145 P16885 P17252 P19838 P27361 P28482 P31749 P31751 P40763 P42224 P42229 P42574 P51178 P60953 P63000 Q04206 Q07812 Q16539	over	0.240222	0.992878	0.125
hsa05145	Toxoplasmosis	4	323	32	4113	0.012384	0.00778	P08754 P09917 P42224 Q16539	O15230 O15264 O60603 P01903 P01909 P01911 P04440 P04899 P05556 P07942 P08754 P09917 P0DMV8 P11047 P11142 P17066 P19838 P23229 P24043 P27361 P28482 P31749 P31751 P40763 P42224 P42574 P55268 P63096 P99999 Q04206 Q16363 Q16539	over	0.240222	0.992878	0.125
hsa04612	Antigen processing and presentation	4	323	33	4113	0.012384	0.008023	P04233 P25208 P25774 P61289	O15533 P01889 P01903 P01909 P01911 P04233 P04439 P04440 P07711 P07858 P07900 P08238 P0DMV8 P10321 P11021 P11142 P13284 P16220 P17066 P25208 P25774 P27797 P27824 P30101 P34932 P54652 P61289 P61769 Q03519 Q06323 Q13952 Q99538 Q9UL46	over	0.257872	0.992878	0.121212
hsa04935	Growth hormone synthesis, secretion and action	4	323	33	4113	0.012384	0.008023	P08754 P42224 P42229 Q16539	O15264 P01111 P01112 P01116 P04899 P08754 P16220 P16885 P17252 P17612 P22694 P27361 P28482 P29992 P31749 P31751 P35858 P36507 P40763 P42224 P42229 P42345 P45985 P46108 P46109 P50148 P62993 P63092 P63096 Q02750 Q05397 Q14573 Q16539	over	0.257872	0.992878	0.121212
hsa05202	Transcriptional misregulation in cancer	4	323	33	4113	0.012384	0.008023	P10145 P14780 P14784 P17844	O43278 O75376 O94812 P05164 P08246 P08571 P10144 P10145 P11215 P12838 P14780 P14784 P14923 P15428 P17844 P19793 P19838 P28702 P29590 P35637 P42773 P59666 P61244 P68431 Q01844 Q04206 Q05397 Q07812 Q92466 Q92769 Q92804 Q96ST3 Q9BYC5	over	0.257872	0.992878	0.121212
hsa05100	Bacterial invasion of epithelial cells	5	323	44	4113	0.01548	0.010698	P14317 P61158 P61160 Q14141 Q9UHD8	O15143 O15144 O15145 O15511 P02751 P05556 P08648 P09496 P09497 P12830 P14317 P18206 P35221 P35222 P46108 P46109 P49023 P50570 P51636 P59998 P60709 P60953 P61158 P61160 P61586 P63000 P84095 Q00610 Q03135 Q05193 Q05397 Q13418 Q14141 Q14247 Q15019 Q92556 Q92599 Q92747 Q9BPX5 Q9NVA2 Q9UHD8 Q9UQ16 Q9Y5K6 Q9Y6W5	over	0.261126	0.992878	0.113636
hsa00513	Various types of N-glycan biosynthesis	2	323	13	4113	0.006192	0.003161	A0A024RAJ6 P07686	A0A024RAJ6 P04843 P04844 P06865 P07686 P15291 P39656 P46977 P61803 Q8TCJ2 Q9BYC5 Q9H0U3 Q9H553	over	0.272018	0.992878	0.153846
hsa04614	Renin-angiotensin system	2	323	13	4113	0.006192	0.003161	P42785 Q4FEB3	O75787 P08311 P08473 P10619 P12821 P15088 P15144 P23946 P42785 P48147 P52888 Q4FEB3 Q9UIQ6	over	0.272018	0.992878	0.153846
hsa04270	Vascular smooth muscle contraction	4	323	34	4113	0.012384	0.008266	O60237 Q05682 Q14344 Q92888	O14974 O60237 O75116 P0DP23 P14555 P17252 P17612 P22694 P24844 P27361 P27482 P28482 P29992 P35579 P35580 P35749 P36507 P36873 P47712 P50148 P60660 P61586 P62136 P62140 P63092 P63267 Q02750 Q05682 Q14344 Q14573 Q15746 Q7Z406 Q92888 Q9NZT1	over	0.27577	0.992878	0.117647
hsa04928	Parathyroid hormone synthesis, secretion and action	3	323	24	4113	0.009288	0.005835	P08754 Q14344 Q92888	O14745 P00533 P04899 P08754 P16220 P17252 P17612 P19793 P22694 P27361 P28482 P28702 P29992 P32121 P49407 P50148 P50281 P61586 P63092 P63096 Q02750 Q14344 Q14573 Q92888	over	0.290548	0.992878	0.125
hsa04144	Endocytosis	11	323	115	4113	0.034056	0.02796	O95630 O95782 P14784 P25098 P61158 P61160 P63010 Q12768 Q641Q2 Q96CW1 Q9H4M9	A8K0Z3 O00499 O14964 O15143 O15144 O15145 O15511 O43516 O43633 O60493 O60749 O75351 O75436 O94973 O95219 O95630 O95782 P00533 P01112 P01889 P02786 P04439 P09496 P09497 P0DMV8 P10321 P11142 P11717 P14207 P14784 P17066 P18085 P20338 P20339 P25098 P29590 P32121 P33176 P42566 P47755 P47756 P49407 P50570 P51148 P51149 P51636 P52907 P53680 P53990 P59998 P60953 P61006 P61020 P61026 P61158 P61160 P61204 …	over	0.290986	0.992878	0.0956522
hsa05166	Human T-cell leukemia virus 1 infection	6	323	58	4113	0.018576	0.014102	P05141 P12235 P14784 P25208 P42229 Q9Y490	O14786 O14980 O43684 P01111 P01112 P01116 P01889 P01903 P01909 P01911 P04439 P04440 P05107 P05141 P05362 P10321 P11166 P12235 P12236 P14324 P14784 P16220 P16298 P17612 P19838 P22694 P25208 P27361 P27797 P27824 P28482 P30536 P31749 P31751 P36507 P42229 P42771 P42773 P43487 P45880 P45985 P48454 P61769 P62826 P63098 Q00653 Q02750 Q04206 Q07812 Q08209 Q08AM6 Q12959 Q8NHZ8 Q9BS18 Q9H6Z4 Q9Y277 Q9Y490 …	over	0.302499	0.992878	0.103448
hsa04922	Glucagon signaling pathway	4	323	36	4113	0.012384	0.008753	P00338 P06737 P11216 P14618	P00338 P06737 P07195 P08237 P08559 P09467 P0DP23 P11166 P11177 P11216 P11217 P13807 P14618 P16220 P16298 P17612 P17858 P18669 P22694 P27482 P31749 P31751 P48454 P50148 P60510 P63092 P63098 Q01813 Q08209 Q13085 Q13555 Q13557 Q14573 Q16822 Q99873 Q9NZT1	over	0.312107	0.992878	0.111111
hsa04664	Fc epsilon RI signaling pathway	3	323	25	4113	0.009288	0.006078	P09917 P30273 Q16539	O15264 P01111 P01112 P01116 P07948 P09917 P15153 P15498 P16885 P17252 P20292 P27361 P28482 P30273 P31749 P31751 P36507 P43405 P45985 P47712 P62993 P63000 Q02750 Q16539 Q92835	over	0.312719	0.992878	0.12
hsa00760	Nicotinate and nicotinamide metabolism	2	323	15	4113	0.006192	0.003647	P40261 Q06278	O14638 P00491 P21589 P40261 P43490 P49902 Q06278 Q10588 Q13423 Q15274 Q4G0N4 Q6XQN6 Q8TCD5 Q9HAN9 Q9NTG7	over	0.331985	0.992878	0.133333
hsa04120	Ubiquitin mediated proteolysis	4	323	38	4113	0.012384	0.009239	O94941 O95714 P62979 Q14139	A0AVT1 O14933 O94941 O95714 P22314 P29590 P61081 P61086 P61088 P62979 P63208 P63279 P68036 Q13616 Q13617 Q13618 Q13619 Q14139 Q14669 Q15369 Q15370 Q16531 Q712K3 Q7Z6Z7 Q8NHZ8 Q8TBC4 Q92466 Q93034 Q96J02 Q96PU5 Q9BS18 Q9C0C9 Q9H832 Q9UBE0 Q9UBT2 Q9UK22 Q9UMS4 Q9UNE7	over	0.34885	0.992878	0.105263
hsa05323	Rheumatoid arthritis	3	323	27	4113	0.009288	0.006565	O75888 P10145 P21283	O60603 O75348 O75888 P01903 P01909 P01911 P03956 P04440 P05107 P05362 P07711 P10145 P13686 P21281 P21283 P36543 P38606 P43235 P48061 P61421 Q13488 Q14116 Q15904 Q16864 Q93050 Q9UI12 Q9Y5K8	over	0.357112	0.992878	0.111111
hsa04613	Neutrophil extracellular trap formation	6	323	62	4113	0.018576	0.015074	P05141 P12235 P21462 P57764 Q16539 Q9UM07	O15264 O60603 O60814 O75367 O95352 P01024 P01031 P02671 P02675 P02679 P04275 P04839 P05106 P05107 P05141 P05164 P08246 P08311 P08514 P08637 P09429 P0C0S5 P0C0S8 P11215 P12235 P12236 P13498 P14598 P15153 P16885 P17252 P19838 P19878 P20160 P21462 P27361 P28482 P29466 P31749 P31751 P36507 P42345 P43405 P45880 P49662 P49913 P57764 P60709 P62805 P63000 P68431 Q02750 Q04206 Q15080 Q16539 Q8IUE6 Q8N257 …	over	0.359705	0.992878	0.0967742
hsa00561	Glycerolipid metabolism	2	323	16	4113	0.006192	0.00389	O60218 P05091	C9JRZ8 O14495 O60218 P05091 P06280 P14550 P15121 P23743 P30837 P32189 P49189 P49419 P51648 Q3LXA3 Q99685 Q9NRZ7	over	0.361484	0.992878	0.125
hsa04727	GABAergic synapse	2	323	16	4113	0.006192	0.00389	P08754 P46459	P04899 P08754 P15104 P17252 P17612 P22694 P46459 P50151 P59768 P60520 P62873 P62879 P63096 P63218 Q9HAV0 Q9UBI6	over	0.361484	0.992878	0.125
hsa04510	Focal adhesion	8	323	87	4113	0.024768	0.021152	O60237 P12814 P21333 P50552 Q13683 Q15942 Q9UQP3 Q9Y490	A6NMZ7 A8TX70 O14950 O14974 O15230 O43707 O60237 O60610 O75116 O75369 P00533 P01112 P02452 P02458 P02462 P02751 P04004 P04275 P05106 P05556 P06756 P07942 P07996 P08123 P08514 P08572 P08648 P09619 P11047 P12109 P12110 P12111 P12814 P15153 P15498 P16144 P17252 P17301 P17655 P18084 P18206 P18564 P21333 P22105 P23229 P24043 P24821 P24844 P26006 P27361 P28482 P31749 P31751 P35222 P35442 P36873 P46108 …	over	0.374765	0.992878	0.091954
hsa05142	Chagas disease	3	323	28	4113	0.009288	0.006808	P08754 P10145 Q16539	O15264 O60603 P01024 P01042 P02745 P02746 P02747 P04899 P08754 P10145 P12821 P19838 P27361 P27797 P28482 P29992 P30153 P31749 P31751 P45985 P50148 P63092 P63096 P63151 P67775 Q04206 Q13158 Q16539	over	0.379189	0.992878	0.107143
hsa05205	Proteoglycans in cancer	8	323	88	4113	0.024768	0.021396	O60237 P14317 P14780 P17844 P21333 P26038 Q16539 Q92888	O14974 O15264 O60237 O60603 O75116 P00533 P01111 P01112 P01116 P01344 P02452 P02751 P04004 P05106 P05556 P06756 P07585 P07711 P07996 P08123 P08253 P08648 P08962 P09038 P10301 P14317 P14780 P15311 P15498 P16070 P16157 P16885 P17252 P17301 P17612 P17844 P18084 P18827 P19634 P21333 P22694 P23588 P26038 P27361 P28482 P29350 P31431 P31749 P31751 P34741 P35052 P35222 P35241 P35625 P36507 P36873 P40763 …	over	0.387067	0.992878	0.0909091
hsa02010	ABC transporters	1	323	6	4113	0.003096	0.001459	Q99758	O94911 P28288 Q03519 Q8N139 Q99758 Q9NP58	over	0.388005	0.992878	0.166667
hsa04930	Type II diabetes mellitus	1	323	6	4113	0.003096	0.001459	P14618	P14618 P19367 P27361 P28482 P42345 P52790	over	0.388005	0.992878	0.166667
hsa00500	Starch and sucrose metabolism	2	323	17	4113	0.006192	0.004133	P06737 P11216	O14638 O43451 P04746 P06737 P06744 P10253 P11216 P11217 P13807 P19367 P35573 P36871 P46976 P52790 Q04446 Q16851 Q96G03	over	0.390484	0.992878	0.117647
hsa04080	Neuroactive ligand-receptor interaction	2	323	17	4113	0.006192	0.004133	O00264 P21462	O00264 O15173 P00734 P00747 P01024 P01031 P01042 P01282 P08311 P0DP57 P21462 P22466 P30536 P35030 P55000 Q5BJF2 Q99572	over	0.390484	0.992878	0.117647
hsa04213	Longevity regulating pathway - multiple species	2	323	17	4113	0.006192	0.004133	P00441 P04179	P00441 P01111 P01112 P01116 P02511 P04040 P04179 P0DMV8 P11142 P17066 P17612 P22694 P31749 P31751 P42345 Q92769 Q9H078	over	0.390484	0.992878	0.117647
hsa05032	Morphine addiction	2	323	17	4113	0.006192	0.004133	P08754 P25098	P04899 P08754 P17252 P17612 P22694 P25098 P32121 P49407 P50151 P59768 P62873 P62879 P63092 P63096 P63218 Q9HAV0 Q9UBI6	over	0.390484	0.992878	0.117647
hsa05219	Bladder cancer	2	323	17	4113	0.006192	0.004133	P10145 P14780	O75582 P00533 P01111 P01112 P01116 P03956 P07996 P08253 P10145 P12830 P14780 P19971 P27361 P28482 P36507 P42771 Q02750	over	0.390484	0.992878	0.117647
hsa04145	Phagosome	8	323	89	4113	0.024768	0.021639	P11279 P13473 P21283 P24071 P25774 Q86Y82 Q9NNX6 Q9UBG0	O14964 O15400 O43237 O60603 O75348 O75396 P00736 P01024 P01889 P01903 P01909 P01911 P02786 P04350 P04439 P04440 P04839 P05106 P05107 P05164 P05556 P06756 P07437 P07711 P07996 P08571 P08637 P08648 P0DPH7 P10321 P11215 P11279 P13473 P13498 P14598 P16671 P17301 P18084 P19878 P20339 P20645 P21281 P21283 P21757 P22897 P24071 P25774 P27797 P27824 P31146 P35442 P36543 P38606 P49746 P49747 P51148 P51149 …	over	0.399385	0.992878	0.0898876
hsa05120	Epithelial cell signaling in Helicobacter pylori infection	3	323	29	4113	0.009288	0.007051	P10145 P21283 Q16539	O14672 O15264 O75348 P00533 P07948 P10145 P16885 P19838 P21281 P21283 P36543 P38606 P41240 P42574 P45985 P60953 P61421 P63000 Q04206 Q06124 Q07157 Q13488 Q15904 Q16539 Q16864 Q93050 Q9UI12 Q9Y5K8 Q9Y624	over	0.401103	0.992878	0.103448
hsa05230	Central carbon metabolism in cancer	3	323	29	4113	0.009288	0.007051	P00338 P14618 Q15758	O75874 P00338 P00533 P01111 P01112 P01116 P07195 P08237 P08559 P09619 P11166 P11177 P11413 P14618 P17858 P18669 P19367 P27361 P28482 P31749 P31751 P36507 P42345 P48735 P52790 Q01813 Q02750 Q15758 Q9NTG7	over	0.401103	0.992878	0.103448
hsa04015	Rap1 signaling pathway	5	323	53	4113	0.01548	0.012886	P08754 P21462 P50552 Q16539 Q9Y490	O15264 O60716 P00533 P01111 P01112 P01116 P04899 P05106 P05107 P05556 P07737 P07996 P08514 P08754 P09038 P09619 P0DP23 P10301 P11215 P11233 P11234 P12830 P15153 P15498 P17252 P21462 P27361 P27482 P28482 P31749 P31751 P35080 P35222 P36507 P46108 P46109 P50148 P50552 P60709 P60953 P61586 P62834 P63000 P63092 P63096 Q02750 Q16539 Q7Z5R6 Q8N8S7 Q96FS4 Q9NZT1 Q9Y490 Q9Y4G6	over	0.404133	0.992878	0.0943396
hsa05415	Diabetic cardiomyopathy	10	323	114	4113	0.03096	0.027717	P05141 P07919 P12235 P14780 P15954 P16615 P30049 Q16539 Q4FEB3 Q93084	O00217 O00483 O14561 O14949 O14957 O15239 O15264 O43181 O43674 O43676 O43677 O43678 O43920 O75306 O75380 O75438 O75489 O75947 O95167 O95168 O95182 O95299 O96000 P00390 P00403 P00414 P02452 P02461 P03928 P04406 P04839 P05141 P05496 P06576 P07339 P07919 P08123 P08253 P08559 P08574 P09669 P09874 P10606 P11166 P11177 P11413 P12074 P12235 P12236 P12821 P13073 P13498 P13807 P14406 P14598 P14780 P14854 …	over	0.405759	0.992878	0.0877193
hsa04666	Fc gamma R-mediated phagocytosis	4	323	42	4113	0.012384	0.010212	P42768 P50552 P61158 P61160	O00499 O14495 O15143 O15144 O15145 O15511 P06396 P07948 P08575 P08631 P08637 P14598 P15153 P15498 P16885 P17252 P23528 P27361 P28482 P29966 P31749 P31751 P42768 P43405 P46108 P46109 P47712 P49006 P50552 P50570 P59998 P60953 P61158 P61160 P62330 P63000 Q02750 Q92747 Q92835 Q9BPX5 Q9Y6U3 Q9Y6W5	over	0.422187	0.992878	0.0952381
hsa04972	Pancreatic secretion	3	323	30	4113	0.009288	0.007294	P16615 P20020 Q93084	O00194 O95716 P00918 P04746 P05023 P05026 P14555 P15088 P16615 P17252 P19634 P20020 P23634 P35030 P50148 P54709 P55011 P61006 P61586 P62491 P62834 P63000 P63092 Q10588 Q14573 Q14CN2 Q93084 Q96IY4 Q9UQC9 Q9Y6R1	over	0.422796	0.992878	0.1
hsa05410	Hypertrophic cardiomyopathy	3	323	30	4113	0.009288	0.007294	P16615 Q13683 Q93084	P02545 P05106 P05556 P06753 P06756 P07951 P08514 P08648 P09493 P11532 P12821 P16144 P16615 P17301 P17661 P18084 P18564 P23229 P24043 P26006 P50402 P54289 P56199 P60709 P67936 Q13425 Q13683 Q14118 Q8WZ42 Q93084	over	0.422796	0.992878	0.1
hsa04810	Regulation of actin cytoskeleton	9	323	104	4113	0.027864	0.025286	O60237 P12814 P26038 P61158 P61160 Q13576 Q13683 Q14344 Q92888	O14950 O14974 O15143 O15144 O15145 O15511 O43707 O60237 O60610 O75116 P00533 P00734 P01031 P01042 P01111 P01112 P01116 P02748 P02751 P05106 P05107 P05556 P06396 P06756 P07357 P07358 P07360 P07737 P08514 P08648 P09038 P09619 P10301 P10643 P11215 P12814 P13671 P15153 P15311 P15498 P16144 P17301 P18084 P18206 P18564 P19634 P23229 P23528 P24844 P26006 P26038 P27361 P28482 P31749 P31751 P35080 P35241 …	over	0.431845	0.992878	0.0865385
hsa00730	Thiamine metabolism	1	323	7	4113	0.003096	0.001702	P05186	P00568 P05186 P24666 P27144 P54819 Q9BSD7 Q9Y697	over	0.436136	0.992878	0.142857
hsa04672	Intestinal immune network for IgA production	1	323	7	4113	0.003096	0.001702	O75888	O75144 O75888 P01903 P01909 P01911 P04440 P48061	over	0.436136	0.992878	0.142857
hsa05150	Staphylococcus aureus infection	4	323	43	4113	0.012384	0.010455	P05783 P08779 P21462 P24071	A1A4E9 B3KVF5 P00736 P00746 P00747 P00751 P01024 P01031 P01903 P01909 P01911 P02533 P02679 P02745 P02746 P02747 P04440 P05107 P05156 P05362 P05783 P06681 P08603 P08637 P08727 P08779 P09871 P0C0L4 P11215 P12838 P13645 P13646 P19012 P21462 P24071 P35527 P49913 P59666 Q02413 Q04695 Q15323 Q7Z3Z0 Q9C075	over	0.440269	0.992878	0.0930233
hsa04062	Chemokine signaling pathway	5	323	56	4113	0.01548	0.013615	P08754 P10145 P25098 P42224 P42768	O00585 O75116 P01111 P01112 P01116 P02775 P02776 P04899 P07948 P08631 P08754 P09769 P10145 P14598 P15153 P15498 P16885 P17612 P19838 P22694 P25098 P27361 P28482 P31749 P31751 P32121 P40763 P42224 P42768 P46108 P46109 P48061 P49023 P49407 P50148 P50151 P55774 P59768 P60953 P61586 P62834 P62873 P62879 P62993 P63000 P63096 P63218 Q02750 Q04206 Q05397 Q16627 Q8TCU6 Q92556 Q92608 Q9HAV0 Q9UBI6	over	0.451907	0.992878	0.0892857
hsa00620	Pyruvate metabolism	3	323	32	4113	0.009288	0.00778	P00338 P05091 P14618	P00325 P00326 P00338 P05091 P07195 P07311 P07954 P08559 P09622 P10515 P11177 P11498 P11766 P14550 P14618 P14621 P23368 P24752 P30837 P40925 P40926 P48163 P49189 P49419 P51648 Q04760 Q13085 Q16775 Q16822 Q9BWD1 Q9NR19 Q9UBQ7	over	0.465319	0.992878	0.09375
hsa05412	Arrhythmogenic right ventricular cardiomyopathy	3	323	32	4113	0.009288	0.00778	P16615 Q13683 Q93084	P02545 P05106 P05556 P06756 P08514 P08648 P11532 P14923 P15924 P16144 P16615 P17301 P17302 P17661 P18084 P18564 P23229 P24043 P26006 P35221 P35222 P35609 P50402 P54289 P56199 P60709 Q02487 Q13425 Q13683 Q14118 Q14126 Q93084	over	0.465319	0.992878	0.09375
hsa05414	Dilated cardiomyopathy	3	323	32	4113	0.009288	0.00778	P16615 Q13683 Q93084	P02545 P05106 P05556 P06753 P06756 P07951 P08514 P08648 P09493 P11532 P16144 P16615 P17301 P17612 P17661 P18084 P18564 P22694 P23229 P24043 P26006 P50402 P54289 P56199 P60709 P63092 P67936 Q13425 Q13683 Q14118 Q8WZ42 Q93084	over	0.465319	0.992878	0.09375
hsa00380	Tryptophan metabolism	2	323	20	4113	0.006192	0.004863	P05091 Q06278	P04040 P05091 P09622 P21397 P24752 P27338 P30084 P30837 P36957 P40939 P46952 P49189 P49419 P51648 Q06278 Q16836 Q6YP21 Q92947 Q96RQ9 Q9BWD1	over	0.473551	0.992878	0.1
hsa04730	Long-term depression	2	323	20	4113	0.006192	0.004863	P08754 Q14344	P01111 P01112 P01116 P04899 P07948 P08754 P17252 P27361 P28482 P29992 P30153 P36507 P47712 P50148 P63092 P63096 P67775 Q02750 Q14344 Q14573	over	0.473551	0.992878	0.1
hsa04024	cAMP signaling pathway	4	323	45	4113	0.012384	0.010941	P08754 P16615 P20020 Q93084	O14974 O75116 P01282 P04899 P05023 P05026 P08754 P0DP23 P10301 P15153 P15498 P16220 P16615 P17612 P19634 P19838 P20020 P22694 P23634 P24844 P27361 P27482 P28482 P31749 P31751 P36507 P36873 P54709 P61586 P62070 P62136 P62140 P62834 P63000 P63092 P63096 Q02750 Q04206 Q05469 Q13555 Q13557 Q15067 Q93084 Q9NZT1 Q9UD71	over	0.475901	0.992878	0.0888889
hsa04218	Cellular senescence	4	323	45	4113	0.012384	0.010941	P05141 P10145 P12235 Q16539	O15264 P01111 P01112 P01116 P01889 P04439 P05141 P07384 P0DP23 P10145 P10301 P10321 P12235 P12236 P16298 P17655 P19838 P27361 P27482 P28482 P31749 P31751 P36507 P36873 P42345 P42771 P45880 P48454 P49959 P62070 P62136 P62140 P63098 Q00534 Q02750 Q04206 Q08209 Q08752 Q09028 Q14573 Q15382 Q16539 Q92878 Q9NZT1 Q9Y277	over	0.475901	0.992878	0.0888889
hsa00053	Ascorbate and aldarate metabolism	1	323	8	4113	0.003096	0.001945	P05091	O60701 P05091 P08236 P14550 P30837 P49189 P49419 P51648	over	0.480493	0.992878	0.125
hsa00785	Lipoic acid metabolism	1	323	8	4113	0.003096	0.001945	Q02218	P08559 P09622 P10515 P11177 P11182 P12694 P36957 Q02218	over	0.480493	0.992878	0.125
hsa03022	Basal transcription factors	1	323	8	4113	0.003096	0.001945	P52655	P13984 P18074 P35269 P51948 P52655 P78347 Q16594 Q92804	over	0.480493	0.992878	0.125
hsa04215	Apoptosis - multiple species	1	323	8	4113	0.003096	0.001945	Q9NR28	O43464 P42574 P55210 P55957 P99999 Q07812 Q13158 Q9NR28	over	0.480493	0.992878	0.125
hsa04340	Hedgehog signaling pathway	1	323	8	4113	0.003096	0.001945	P25098	P17612 P22694 P25098 P32121 P48729 P49407 Q13616 Q13618	over	0.480493	0.992878	0.125
hsa04913	Ovarian steroidogenesis	1	323	8	4113	0.003096	0.001945	P09917	P09917 P14060 P17612 P22694 P42330 P47712 P63092 Q86TX2	over	0.480493	0.992878	0.125
hsa05310	Asthma	1	323	8	4113	0.003096	0.001945	P30273	P01903 P01909 P01911 P04440 P11678 P12724 P15248 P30273	over	0.480493	0.992878	0.125
hsa00230	Purine metabolism	4	323	47	4113	0.012384	0.011427	O15067 O76074 P30520 Q01432	O14638 O15067 O43252 O76074 O95340 P00491 P00492 P00568 P00813 P07741 P11908 P12268 P15531 P21589 P22102 P22234 P22392 P23921 P27144 P30520 P30566 P31939 P36871 P49789 P49902 P49915 P49961 P50583 P54819 P55263 P60891 Q01432 Q13232 Q16774 Q7Z4H3 Q8N4P3 Q8TCD5 Q96DE0 Q96G03 Q9BSD7 Q9BY32 Q9NZK5 Q9P2T1 Q9UIJ7 Q9UKK9 Q9Y2T3 Q9Y6X5	over	0.510643	0.992878	0.0851064
hsa05206	MicroRNAs in cancer	4	323	47	4113	0.012384	0.011427	O95980 P14780 Q16658 Q9UQP3	O75582 O95980 P00533 P01111 P01112 P01116 P05106 P07996 P08648 P08670 P09493 P09601 P09619 P14780 P15311 P16070 P16885 P16949 P17252 P19838 P22105 P24821 P27361 P28482 P29966 P35241 P35625 P36507 P36952 P40763 P42345 P42574 P42771 P46108 P46109 P61586 P61978 P62993 P63279 Q00534 Q02750 Q04721 Q16658 Q53EL6 Q92769 Q9H3D4 Q9UQP3	over	0.510643	0.992878	0.0851064
hsa04915	Estrogen signaling pathway	4	323	48	4113	0.012384	0.01167	P05783 P08754 P08779 P14780	A1A4E9 B3KVF5 P00533 P01111 P01112 P01116 P02533 P04899 P05783 P07339 P07900 P08238 P08253 P08727 P08754 P08779 P0DMV8 P0DP23 P11142 P13645 P13646 P14625 P14780 P16220 P17066 P17612 P19012 P22694 P27361 P27482 P28482 P31749 P31751 P35527 P36507 P50148 P62993 P63092 P63096 Q02750 Q02790 Q04695 Q13451 Q14573 Q15323 Q7Z3Z0 Q9C075 Q9NZT1	over	0.527621	0.992878	0.0833333
hsa05203	Viral carcinogenesis	5	323	62	4113	0.01548	0.015074	O00571 P12814 P14618 P42229 P52655	O00571 O43707 O60814 P01024 P01111 P01112 P01116 P01889 P04439 P06396 P07948 P10321 P12814 P14618 P16220 P17612 P19525 P19838 P22694 P23497 P27348 P27361 P28482 P31946 P40763 P42229 P42574 P42771 P43405 P43487 P49023 P52655 P60953 P61421 P61586 P61978 P61981 P62191 P62258 P62805 P62993 P63000 P63104 Q00534 Q00653 Q04206 Q04917 Q07812 Q08AM6 Q12959 Q14160 Q14839 Q15628 Q16531 Q5T4S7 Q7KZF4 Q8N257 …	over	0.543759	0.992878	0.0806452
hsa04072	Phospholipase D signaling pathway	3	323	36	4113	0.009288	0.008753	P10145 P30273 Q14344	O14495 P00533 P00734 P01111 P01112 P01116 P09619 P10145 P10301 P11233 P11234 P16885 P17252 P23743 P27361 P28482 P30273 P31749 P31751 P36507 P42345 P43405 P47712 P50570 P61586 P62070 P62330 P62993 P63092 Q02750 Q05193 Q06124 Q14344 Q15382 Q9NRZ7 Q9UQ16	over	0.545818	0.992878	0.0833333
hsa04936	Alcoholic liver disease	3	323	36	4113	0.009288	0.008753	P05091 P10145 Q16539	O15264 P00325 P00326 P01024 P01031 P02745 P02746 P02747 P05091 P06681 P08571 P0C0L4 P10145 P11310 P11766 P18428 P19838 P30837 P31749 P31751 P35222 P42574 P45985 P49189 P49327 P49419 P49748 P51648 P62995 Q04206 Q13085 Q13158 Q13595 Q15067 Q15628 Q16539	over	0.545818	0.992878	0.0833333
hsa05133	Pertussis	3	323	36	4113	0.009288	0.008753	P08754 P10145 Q16539	O15264 P00736 P01024 P01031 P02745 P02746 P02747 P04003 P04899 P05107 P05155 P05556 P06681 P08571 P08648 P08754 P09871 P0C0L4 P0DP23 P10145 P11215 P19838 P20851 P23528 P27361 P27482 P28482 P29466 P42574 P55210 P61586 P63096 Q04206 Q16539 Q9NZT1 Q9ULZ3	over	0.545818	0.992878	0.0833333
hsa00330	Arginine and proline metabolism	2	323	23	4113	0.006192	0.005592	P05091 Q53H96	O15460 P00505 P04181 P05089 P05091 P06732 P12277 P12532 P13674 P17174 P19623 P21397 P27338 P28838 P30038 P30837 P49189 P49419 P51648 P52788 P54886 Q53H96 Q96KP4	over	0.549436	0.992878	0.0869565
hsa00590	Arachidonic acid metabolism	2	323	23	4113	0.006192	0.005592	P09917 Q16647	O15296 O60760 O75342 O75828 P09917 P09960 P14555 P15428 P16152 P23219 P24557 P34913 P36269 P36969 P41222 P42330 P47712 P78329 Q14914 Q15185 Q16647 Q9BYJ1 Q9H7Z7	over	0.549436	0.992878	0.0869565
hsa03250	Viral life cycle - HIV-1	2	323	23	4113	0.006192	0.005592	P63272 Q9Y3Z3	O14964 O14980 O75351 O75475 P20591 P20592 P46821 P49792 P62826 P62937 P63272 Q12824 Q13526 Q16630 Q66K74 Q8N684 Q8WUM4 Q8WX92 Q99816 Q9BY43 Q9H444 Q9UN37 Q9Y3Z3	over	0.549436	0.992878	0.0869565
hsa04068	FoxO signaling pathway	2	323	23	4113	0.006192	0.005592	P04179 Q16539	O15264 P00533 P01111 P01112 P01116 P04040 P04179 P27361 P28482 P31749 P31751 P36507 P40763 P60520 P62993 Q02750 Q13043 Q16539 Q16822 Q8WTS6 Q93009 Q99873 Q9NSC5	over	0.549436	0.992878	0.0869565
hsa00280	Valine, leucine and isoleucine degradation	3	323	37	4113	0.009288	0.008996	O15382 P05091 Q06278	O15382 P05091 P09110 P09622 P11182 P11310 P12694 P16219 P22033 P24752 P26440 P30084 P30837 P31937 P35914 P40939 P42765 P45954 P49189 P49419 P51648 P54868 P55084 P55809 Q01581 Q02252 Q06278 Q16836 Q6NVY1 Q86V21 Q96PE7 Q96RQ3 Q96RQ9 Q99714 Q9BWD1 Q9HCC0 Q9UKU7	over	0.564821	0.992878	0.0810811
hsa04931	Insulin resistance	2	323	24	4113	0.006192	0.005835	P06737 P11216	O60502 P06737 P11166 P11216 P11217 P13807 P16220 P16671 P18031 P19838 P31749 P31751 P36873 P40763 P42345 P51812 P62136 P62140 Q04206 Q06124 Q06210 Q15257 Q15418 Q16822	over	0.572971	0.992878	0.0833333
hsa04919	Thyroid hormone signaling pathway	3	323	38	4113	0.009288	0.009239	P16615 P42224 Q93084	O75376 P01111 P01112 P01116 P05023 P05026 P05106 P06756 P08237 P11166 P16615 P16885 P17252 P17612 P17858 P19634 P19793 P22694 P27361 P28482 P28702 P31749 P31751 P35222 P36507 P42224 P42345 P51178 P54709 P60709 Q01813 Q02750 Q04721 Q15382 Q71F56 Q92769 Q93084 Q96ST3	over	0.583332	0.992878	0.0789474
hsa00040	Pentose and glucuronate interconversions	1	323	11	4113	0.003096	0.002674	O60218	C9JRZ8 O60218 O60701 P08236 P14550 P15121 Q00796 Q16851 Q7Z4W1 Q96AT9 Q9Y2S2	over	0.593753	0.992878	0.0909091
hsa00340	Histidine metabolism	1	323	11	4113	0.003096	0.002674	P05091	P05091 P21397 P27338 P30837 P30838 P42357 P49189 P49419 P50135 P51648 Q96KP4	over	0.593753	0.992878	0.0909091
hsa00565	Ether lipid metabolism	1	323	11	4113	0.003096	0.002674	O00116	O00116 O14495 P14555 P43034 P47712 P68402 Q13404 Q13822 Q15102 Q7L5N7 Q8IV08	over	0.593753	0.992878	0.0909091
hsa05321	Inflammatory bowel disease	1	323	11	4113	0.003096	0.002674	P42224	O60603 P01903 P01909 P01911 P04440 P19838 P40763 P42224 P42226 Q04206 Q14116	over	0.593753	0.992878	0.0909091
hsa01522	Endocrine resistance	2	323	25	4113	0.006192	0.006078	P14780 Q16539	O15264 O75376 P00533 P01111 P01112 P01116 P08253 P14780 P17612 P22694 P27361 P28482 P31749 P31751 P36507 P42345 P42771 P42773 P62993 P63092 Q02750 Q04721 Q05397 Q07812 Q16539	over	0.595601	0.992878	0.08
hsa04970	Salivary secretion	2	323	25	4113	0.006192	0.006078	P01037 P20020	P01034 P01037 P02810 P04746 P05023 P05026 P0DP23 P17252 P17612 P19634 P20020 P22694 P23634 P27482 P49913 P50148 P54709 P55011 P55064 P61626 P63027 P63092 Q10588 Q14573 Q9NZT1	over	0.595601	0.992878	0.08
hsa04966	Collecting duct acid secretion	1	323	12	4113	0.003096	0.002918	P21283	O75348 P00918 P02730 P21281 P21283 P36543 P38606 P61421 Q13488 Q16864 Q93050 Q9Y5K8	over	0.625742	0.992878	0.0833333
hsa05030	Cocaine addiction	1	323	12	4113	0.003096	0.002918	P08754	P04899 P08754 P16220 P17612 P19838 P21397 P22694 P27338 P63092 P63096 Q04206 Q9UD71	over	0.625742	0.992878	0.0833333
hsa05164	Influenza A	4	323	51	4113	0.012384	0.0124	P05141 P10145 P12235 P42224	O14980 O60684 P00747 P01903 P01909 P01911 P04440 P05141 P05198 P05362 P10145 P12235 P12236 P14324 P17252 P19525 P19838 P20231 P20591 P20592 P25685 P27361 P28482 P29466 P29590 P31749 P31751 P35030 P36507 P42224 P42574 P52948 P55265 P55957 P60709 P62491 P78406 P99999 Q00534 Q02750 Q04206 Q07812 Q13158 Q13217 Q14116 Q14258 Q15628 Q15907 Q86U42 Q9BUJ2 Q9ULZ3	under	0.57675	0.992878	0.0784314
hsa04974	Protein digestion and absorption	3	323	39	4113	0.009288	0.009482	P08195 P42785 Q15758	A6NMZ7 A8TX70 B2ZZ86 O43895 P02452 P02458 P02461 P02462 P05023 P05026 P05997 P08123 P08195 P08473 P08572 P12109 P12110 P12111 P13942 P15088 P15502 P20908 P25940 P27487 P27658 P35030 P39059 P39060 P42785 P54709 Q02388 Q05707 Q07092 Q15758 Q2UY09 Q96IY4 Q96P44 Q99715 Q9UMD9	under	0.601338	0.992878	0.0769231
hsa05017	Spinocerebellar ataxia	4	323	53	4113	0.012384	0.012886	P05141 P12235 P16615 Q93084	O00231 O00232 O00233 O00487 O00567 O14818 O15020 O43242 O60313 P05141 P12235 P12236 P16615 P17252 P17980 P20618 P25786 P25787 P25788 P25789 P28066 P28070 P28072 P28074 P31749 P31751 P35998 P42345 P43686 P45880 P48556 P49720 P49721 P50148 P51665 P55036 P60900 P62191 P62195 P62333 P99999 Q13200 Q14573 Q15008 Q16186 Q8NEB9 Q8WWM7 Q93084 Q99436 Q99460 Q9UNM6 Q9Y277 Q9Y4W6	under	0.607848	0.992878	0.0754717
hsa05418	Fluid shear stress and atherosclerosis	4	323	53	4113	0.012384	0.012886	P10599 P14780 Q16539 Q92974	O14880 O15217 O15264 P00966 P05106 P05362 P06756 P07711 P07900 P08238 P08253 P08514 P09211 P09488 P09601 P0DP23 P10599 P10620 P13498 P14598 P14625 P14780 P15153 P15559 P16284 P18827 P19838 P19878 P21266 P27482 P28161 P30711 P31431 P31749 P31751 P34741 P35052 P35222 P45985 P46439 P51636 P60709 P61586 P61956 P63000 P78417 Q03013 Q03135 Q04206 Q05397 Q16539 Q92974 Q9NZT1	under	0.607848	0.992878	0.0754717
hsa00270	Cysteine and methionine metabolism	2	323	26	4113	0.006192	0.006321	O15382 P00338	O15382 O43175 O43865 P00338 P00505 P07195 P17174 P19623 P23526 P25325 P31153 P40925 P40926 P48506 P48637 P52788 Q13126 Q16762 Q6YP21 Q96GX9 Q96RQ9 Q9BV20 Q9BV57 Q9NZL9 Q9UHY7 Q9Y617	under	0.617324	0.992878	0.0769231
hsa04724	Glutamatergic synapse	2	323	26	4113	0.006192	0.006321	P08754 P25098	P04899 P08754 P15104 P16298 P17252 P17612 P22694 P25098 P27361 P28482 P47712 P48454 P50148 P50151 P59768 P62873 P62879 P63092 P63096 P63098 P63218 Q08209 Q14573 Q9HAV0 Q9NSC5 Q9UBI6	under	0.617324	0.992878	0.0769231
hsa04934	Cushing syndrome	2	323	26	4113	0.006192	0.006321	O14686 P08754	O00170 O14686 P00533 P04899 P07954 P08754 P14060 P16220 P17612 P22694 P27361 P28482 P29992 P35222 P36507 P42771 P42773 P50148 P62834 P63092 P63096 Q00534 Q02750 Q13555 Q13557 Q14573	under	0.617324	0.992878	0.0769231
hsa05140	Leishmaniasis	2	323	26	4113	0.006192	0.006321	P42224 Q16539	O15264 O60603 P01024 P01903 P01909 P01911 P04440 P04839 P05107 P05556 P08637 P11215 P13498 P14598 P19838 P19878 P27361 P28482 P29350 P42224 P49006 P68104 Q04206 Q05639 Q15080 Q16539	under	0.617324	0.992878	0.0769231
hsa01232	Nucleotide metabolism	3	323	40	4113	0.009288	0.009725	P17812 P30520 Q01432	O14638 P00491 P00492 P00568 P00813 P07741 P12268 P15531 P17812 P19971 P21589 P22392 P23919 P23921 P27144 P30085 P30520 P30566 P32320 P32321 P33316 P49902 P49915 P49961 P54819 P55263 Q01432 Q13232 Q16774 Q7Z4H3 Q8TCD5 Q96DE0 Q9BSD7 Q9BY32 Q9H0P0 Q9H773 Q9NZK5 Q9P2T1 Q9UIJ7 Q9Y2T3	under	0.618826	0.992878	0.075
hsa04926	Relaxin signaling pathway	3	323	41	4113	0.009288	0.009968	P08754 P14780 Q16539	O15264 P00533 P01111 P01112 P01116 P02452 P02461 P02462 P03956 P04899 P08123 P08253 P08572 P08754 P14780 P16220 P17252 P17612 P19838 P22694 P27361 P28482 P31749 P31751 P32121 P36507 P45985 P49407 P50151 P59768 P62873 P62879 P62993 P63092 P63096 P63218 Q02750 Q04206 Q16539 Q9HAV0 Q9UBI6	under	0.635789	0.992878	0.0731707
hsa00260	Glycine, serine and threonine metabolism	1	323	13	4113	0.003096	0.003161	P34897	O43175 P07738 P09622 P18669 P21397 P27338 P34896 P34897 P49419 P78330 Q16853 Q9UBQ7 Q9Y617	under	0.655219	0.992878	0.0769231
hsa04978	Mineral absorption	1	323	13	4113	0.003096	0.003161	P20020	O00244 P02787 P02792 P02794 P02795 P05023 P05026 P09601 P20020 P23634 P30519 P54709 Q53TN4	under	0.655219	0.992878	0.0769231
hsa05235	PD-L1 expression and PD-1 checkpoint pathway in cancer	2	323	28	4113	0.006192	0.006808	P42224 Q16539	O15264 O60603 P00533 P01111 P01112 P01116 P16298 P19784 P19838 P27361 P28482 P29350 P31749 P31751 P36507 P40763 P42224 P42345 P48454 P63098 P67870 P68400 Q02750 Q04206 Q06124 Q08209 Q16539 Q9HC35	under	0.65806	0.992878	0.0714286
hsa04148	Efferocytosis	4	323	57	4113	0.012384	0.013858	P09917 P16615 Q16539 Q93084	O14672 O15264 P02745 P02746 P02747 P05089 P05106 P06756 P07225 P07996 P09917 P11166 P16220 P16284 P16615 P16671 P18084 P19793 P20339 P27361 P27797 P28482 P29350 P29466 P35613 P36507 P38571 P42574 P46108 P46109 P47985 P51148 P51149 P55210 P61020 P61106 P63000 P78324 Q02750 Q05397 Q06124 Q07954 Q08431 Q08722 Q13555 Q13557 Q16539 Q59FG2 Q92556 Q93084 Q9H269 Q9H270 Q9NV96 Q9NY15 Q9P253 Q9Y2G3 Q9Y2Q0	under	0.665692	0.992878	0.0701754
hsa05417	Lipid and atherosclerosis	5	323	72	4113	0.01548	0.017505	P04179 P10145 P14780 Q16539 Q92888	O15264 O60603 O75116 P01111 P01112 P01116 P02647 P03956 P04114 P04179 P04839 P05198 P05362 P06727 P07900 P07948 P08238 P08571 P0DMV8 P0DP23 P10145 P10809 P11021 P11142 P13498 P14598 P14625 P14780 P15498 P16298 P16671 P17066 P17252 P18428 P19793 P19838 P19878 P27361 P27482 P28482 P28702 P29466 P31749 P31751 P34932 P40763 P42574 P45985 P48454 P54652 P55210 P55212 P55957 P60953 P61586 P62834 P63000 …	under	0.678273	0.992878	0.0694444
hsa00410	beta-Alanine metabolism	1	323	14	4113	0.003096	0.003404	P05091	P05091 P16219 P30084 P30837 P30838 P40939 P49189 P49419 P51648 Q02252 Q15067 Q16853 Q6NVY1 Q96KP4	under	0.682381	0.992878	0.0714286
hsa00860	Porphyrin metabolism	1	323	14	4113	0.003096	0.003404	P22830	P00450 P02792 P02794 P06132 P07814 P08236 P08397 P09601 P10746 P13716 P22830 P30043 P30519 P53004	under	0.682381	0.992878	0.0714286
hsa04115	p53 signaling pathway	1	323	14	4113	0.003096	0.003404	Q96FX8	P07996 P27701 P31947 P36952 P42574 P42771 P55957 P99999 Q00534 Q07812 Q8WUF5 Q92466 Q96FX8 Q9BRQ8	under	0.682381	0.992878	0.0714286
hsa04740	Olfactory transduction	1	323	14	4113	0.003096	0.003404	P25098	A6NF89 P0DP23 P17612 P22694 P25098 P27482 P32121 P49407 P61601 P62873 Q13555 Q13557 Q8NGA1 Q9NZT1	under	0.682381	0.992878	0.0714286
hsa04923	Regulation of lipolysis in adipocytes	1	323	14	4113	0.003096	0.003404	P08754	O60240 P04899 P08754 P15090 P17612 P22694 P23219 P31749 P31751 P63092 P63096 Q05469 Q8WTS1 Q99685	under	0.682381	0.992878	0.0714286
hsa05016	Huntington disease	11	323	156	4113	0.034056	0.037929	O95782 P00441 P04179 P05141 P07919 P12235 P15954 P21980 P30049 P63010 Q96CW1	O00217 O00231 O00232 O00233 O00291 O00399 O00483 O00487 O14561 O14818 O14949 O14957 O15239 O43181 O43242 O43674 O43676 O43677 O43678 O43920 O75306 O75380 O75438 O75489 O75935 O75947 O94973 O95167 O95168 O95182 O95299 O95782 O96000 P00403 P00414 P00441 P03928 P04179 P04350 P05141 P05496 P06576 P07203 P07437 P07919 P08574 P09496 P09497 P09669 P0DPH7 P10606 P12074 P12235 P12236 P13073 P14406 P14854 …	under	0.692162	0.992878	0.0705128
hsa04910	Insulin signaling pathway	3	323	45	4113	0.009288	0.010941	P06737 P11216 Q14254	O60573 O75955 P01111 P01112 P01116 P06730 P06737 P09467 P0DP23 P10644 P11216 P11217 P13807 P13861 P17612 P18031 P19367 P22694 P27361 P27482 P28482 P31323 P31749 P31751 P36507 P36873 P42345 P46108 P46109 P49327 P52790 P62136 P62140 P62753 P62993 Q02750 Q05469 Q13085 Q14254 Q15382 Q15642 Q16822 Q9BX66 Q9NZT1 Q9UPT5	under	0.698304	0.992878	0.0666667
hsa05163	Human cytomegalovirus infection	5	323	74	4113	0.01548	0.017992	P08754 P10145 Q14344 Q16539 Q92888	O15264 O15533 O75116 P00533 P01111 P01112 P01116 P01889 P04439 P04899 P05106 P06756 P08754 P0DP23 P10145 P10321 P15153 P16220 P16298 P17252 P17612 P19838 P22694 P27361 P27482 P27797 P28482 P29992 P30101 P31749 P31751 P35222 P36507 P40763 P42345 P42574 P42771 P46108 P46109 P48061 P48454 P49023 P50148 P50151 P55957 P59768 P61586 P61769 P62873 P62879 P62993 P63000 P63092 P63096 P63098 P63218 P99999 …	under	0.701756	0.992878	0.0675676
hsa05167	Kaposi sarcoma-associated herpesvirus infection	4	323	60	4113	0.012384	0.014588	P10145 P42224 P62979 Q16539	A6NCE7 O15264 P01024 P01111 P01112 P01116 P01889 P04439 P05362 P07948 P08631 P09038 P0DP23 P10145 P10321 P16220 P16298 P16885 P19525 P19838 P27361 P27482 P28482 P31749 P31751 P35222 P36507 P40763 P42224 P42345 P42574 P43405 P45985 P48454 P50151 P55957 P59768 P62873 P62879 P62979 P63000 P63098 P63218 P99999 Q00534 Q02750 Q04206 Q07812 Q08209 Q13158 Q14573 Q15628 Q16539 Q8NEB9 Q8TCU6 Q9H492 Q9HAV0 …	under	0.705092	0.992878	0.0666667
hsa00350	Tyrosine metabolism	1	323	15	4113	0.003096	0.003647	Q06278	P00325 P00326 P00505 P11766 P14174 P16930 P17174 P21397 P21964 P27338 P30838 Q06278 Q16853 Q6P587 Q96RQ9	under	0.707409	0.992878	0.0666667
hsa03030	DNA replication	1	323	15	4113	0.003096	0.003647	P33992	O75792 P12004 P15927 P25205 P27694 P28340 P33991 P33992 P33993 P35244 P39748 P49736 Q04837 Q14566 Q8TDP1	under	0.707409	0.992878	0.0666667
hsa04550	Signaling pathways regulating pluripotency of stem cells	1	323	15	4113	0.003096	0.003647	Q16539	O15264 P01111 P01112 P01116 P09038 P27361 P28482 P31749 P31751 P35222 P36507 P40763 P62993 Q02750 Q16539	under	0.707409	0.992878	0.0666667
hsa05208	Chemical carcinogenesis - reactive oxygen species	8	323	117	4113	0.024768	0.028446	P00441 P04179 P05141 P07919 P12235 P15954 P30049 Q16539	O00217 O00483 O14561 O14880 O14949 O14957 O15217 O15239 O15264 O43181 O43674 O43676 O43677 O43678 O43920 O75306 O75380 O75438 O75489 O75947 O95167 O95168 O95182 O95299 O96000 P00403 P00414 P00441 P00533 P01111 P01112 P01116 P03928 P04040 P04179 P05141 P05496 P06576 P07099 P07919 P08574 P09488 P09601 P09669 P10606 P10620 P12074 P12235 P12236 P13073 P13498 P14406 P14550 P14598 P14854 P14927 P15559 …	under	0.711264	0.992878	0.0683761
hsa04726	Serotonergic synapse	2	323	31	4113	0.006192	0.007537	P08754 P09917	O15296 O75342 P01111 P01112 P01116 P04899 P05067 P08754 P09917 P17252 P17612 P21397 P22694 P23219 P27338 P27361 P28482 P42574 P47712 P50148 P50151 P59768 P62873 P62879 P63092 P63096 P63218 Q02750 Q14573 Q9HAV0 Q9UBI6	under	0.712571	0.992878	0.0645161
hsa04140	Autophagy - animal	3	323	46	4113	0.009288	0.011184	P11279 P13473 P62979	A6NCE7 O15400 O15498 O95352 O95721 P01111 P01112 P01116 P05198 P07339 P07711 P07858 P09429 P10301 P11279 P13473 P17612 P22694 P27361 P28482 P31749 P31751 P36507 P42345 P51149 P60520 P61006 P62070 P62820 P62979 P67775 Q02750 Q15382 Q7L523 Q8NEB9 Q96CV9 Q9BV40 Q9H082 Q9H269 Q9H270 Q9H492 Q9H8Y8 Q9HB90 Q9NT62 Q9P253 Q9Y371	under	0.7126	0.992878	0.0652174
hsa00250	Alanine, aspartate and glutamate metabolism	1	323	16	4113	0.003096	0.00389	P30520	P00367 P00505 P00966 P04424 P15104 P17174 P24298 P27708 P30038 P30520 P30566 P31327 P51649 Q06210 Q96RQ9 Q9NQR4	under	0.730471	0.992878	0.0625
hsa03008	Ribosome biogenesis in eukaryotes	1	323	16	4113	0.003096	0.00389	Q9H0D6	O00567 O14980 O60832 P19784 P22087 P55769 P56537 P62826 P67870 P68400 Q7Z2Z2 Q9H0D6 Q9NY12 Q9Y2X3 Q9Y3A5 Q9Y3B8	under	0.730471	0.992878	0.0625
hsa00520	Amino sugar and nucleotide sugar metabolism	2	323	33	4113	0.006192	0.008023	A0A024RAJ6 P07686	A0A024RAJ6 O15305 O60547 O60701 O95394 P00387 P06744 P06865 P07686 P19367 P34949 P36871 P46926 P51570 P51606 P52790 Q06210 Q13231 Q13630 Q14376 Q16222 Q16851 Q3KQV9 Q6BCY4 Q8NFW8 Q8TDQ7 Q96G03 Q96IJ6 Q9NR45 Q9UHQ9 Q9UJ70 Q9Y303 Q9Y5P6	under	0.744732	0.992878	0.0606061
hsa05132	Salmonella infection	8	323	121	4113	0.024768	0.029419	P10145 P10599 P21333 P57764 P61158 P61160 Q16539 Q96BM9	O00399 O00471 O00629 O14950 O15143 O15144 O15145 O15264 O15511 O43237 O60603 O75116 O75935 P01112 P04350 P04406 P07355 P07437 P07737 P07900 P08238 P08571 P08575 P0DPH7 P10145 P10301 P10599 P11233 P14625 P19838 P20339 P20645 P21333 P23396 P24844 P27361 P28482 P29466 P31749 P31751 P33176 P35080 P35222 P36507 P42025 P42574 P45985 P49662 P50570 P51148 P51149 P51151 P55060 P55160 P55210 P57764 P59998 …	under	0.746037	0.992878	0.0661157
hsa00562	Inositol phosphate metabolism	1	323	17	4113	0.003096	0.004133	P29218	O14732 O14735 P16885 P29218 P48426 P49441 P51178 P60174 Q02252 Q13613 Q8NEB9 Q8TBX8 Q92835 Q9BT40 Q9BTU6 Q9NPH2 Q9NTJ5	under	0.75172	0.992878	0.0588235
hsa04210	Apoptosis	3	323	49	4113	0.009288	0.011913	O60911 P25774 Q9NR28	O00273 O43464 O60911 O95831 P01111 P01112 P01116 P02545 P02549 P05198 P07339 P07384 P07711 P07858 P09668 P09874 P0DPH7 P10144 P17655 P19838 P20700 P25774 P27361 P28482 P31749 P31751 P36507 P42574 P43235 P53634 P55210 P55212 P55957 P60709 P68366 P99999 Q02750 Q03252 Q04206 Q07812 Q12923 Q13158 Q13813 Q14573 Q15628 Q9BQE3 Q9NR28 Q9UBR2 Q9UKK3	under	0.752357	0.992878	0.0612245
hsa05146	Amoebiasis	3	323	49	4113	0.009288	0.011913	P10145 P12814 P48595	O15230 O43707 O60603 P02452 P02461 P02462 P02748 P02751 P04792 P05089 P05107 P06126 P07357 P07358 P07360 P07942 P08123 P08311 P08571 P08572 P10145 P11047 P11215 P12814 P17252 P17612 P18206 P19838 P20339 P22694 P24043 P29508 P29992 P35237 P42574 P48594 P48595 P50148 P50453 P51148 P51149 P55268 P61020 P63092 Q04206 Q05397 Q06830 Q16363 Q9UIV8	under	0.752357	0.992878	0.0612245
hsa03013	Nucleocytoplasmic transport	3	323	50	4113	0.009288	0.012157	Q8NFH3 Q92973 Q9UI26	O00410 O00422 O00629 O14787 O14980 O60684 O75694 O95373 P12270 P37198 P38919 P46060 P49792 P52948 P55060 P55735 P57088 P57740 P61326 P61956 P62826 P63279 P68104 P78406 Q05639 Q09161 Q13838 Q14974 Q15287 Q7Z3B4 Q86V81 Q8IYB3 Q8NFH3 Q8NFH5 Q8TEX9 Q8WUM0 Q92621 Q92900 Q92973 Q96EE3 Q9BRP8 Q9H2T7 Q9H307 Q9H814 Q9HAV4 Q9NUU7 Q9UI26 Q9UIA9 Q9UKV3 Q9Y5S9	under	0.764591	0.992878	0.06
hsa00630	Glyoxylate and dicarboxylate metabolism	1	323	18	4113	0.003096	0.004376	P34897	A6NDG6 O75390 P04040 P09622 P15104 P21399 P22033 P24752 P34896 P34897 P40925 P40926 Q5T013 Q96PE7 Q99798 Q9BWD1 Q9NR19 Q9UBQ7	under	0.771299	0.992878	0.0555556
hsa03060	Protein export	1	323	18	4113	0.003096	0.004376	Q15005	O43681 O43765 O76094 P08240 P11021 P11441 P37108 P46379 P49458 P60059 P60468 P61011 P67812 Q15005 Q7L5D6 Q9UGP8 Q9UHB9 Q9Y5M8	under	0.771299	0.992878	0.0555556
hsa04211	Longevity regulating pathway	1	323	18	4113	0.003096	0.004376	P04179	O60573 P01111 P01112 P01116 P04040 P04179 P06730 P16220 P17612 P19838 P22694 P31749 P31751 P42345 Q04206 Q07812 Q15382 Q9UKG1	under	0.771299	0.992878	0.0555556
hsa04520	Adherens junction	2	323	36	4113	0.006192	0.008753	P12814 P42768	O14950 O43707 O60716 O75116 P00533 P12814 P12830 P15153 P18031 P18206 P19784 P24666 P24844 P27361 P28482 P29350 P35221 P35222 P42768 P46940 P60709 P60953 P61586 P62834 P63000 P67870 P68400 Q07157 Q12913 Q15223 Q92692 Q96NY8 Q9BUL8 Q9BX66 Q9UQB8 Q9Y6W5	under	0.787174	0.992878	0.0555556
hsa00052	Galactose metabolism	1	323	19	4113	0.003096	0.004619	O60218	C9JRZ8 O43451 O60218 P06280 P08237 P10253 P15121 P15291 P16278 P17858 P19367 P36871 P51570 P52790 Q01813 Q14376 Q16851 Q96C23 Q96G03	under	0.789338	0.992878	0.0526316
hsa03420	Nucleotide excision repair	1	323	19	4113	0.003096	0.004619	P54727	P12004 P15927 P18074 P19387 P27694 P28340 P30876 P35244 P36954 P41208 P51948 P52434 P54725 P54727 P62875 Q13619 Q16531 Q6EEV4 Q92466	under	0.789338	0.992878	0.0526316
hsa04750	Inflammatory mediator regulation of TRP channels	1	323	19	4113	0.003096	0.004619	Q16539	O15264 P01042 P0DP23 P16885 P17252 P17612 P22694 P27482 P36873 P47712 P50148 P62136 P62140 P63092 Q13555 Q13557 Q14573 Q16539 Q9NZT1	under	0.789338	0.992878	0.0526316
hsa05144	Malaria	1	323	19	4113	0.003096	0.004619	P10145	O60603 P04921 P05107 P05362 P07996 P10145 P16284 P16671 P18827 P34741 P35442 P49746 P49747 P60033 P68871 P69905 Q07954 Q14116 Q59FG2	under	0.789338	0.992878	0.0526316
hsa00640	Propanoate metabolism	1	323	20	4113	0.003096	0.004863	P00338	P00338 P07195 P09622 P11182 P12694 P16219 P22033 P30084 P40939 P53597 Q02252 Q13085 Q15067 Q6NVY1 Q96I99 Q96PE7 Q9H6R3 Q9NR19 Q9NTX5 Q9P2R7	under	0.805959	0.992878	0.05
hsa00982	Drug metabolism - cytochrome P450	1	323	20	4113	0.003096	0.004863	Q06278	O14880 O15217 O60760 P00325 P00326 P09211 P09488 P10620 P11766 P21266 P21397 P27338 P28161 P30711 P30838 P46439 P78417 Q03013 Q06278 Q9Y2Q3	under	0.805959	0.992878	0.05
hsa04070	Phosphatidylinositol signaling system	1	323	20	4113	0.003096	0.004863	P29218	O14732 O14735 O95674 P0DP23 P16885 P17252 P23743 P27482 P29218 P48426 P49441 P51178 Q13613 Q14573 Q8NEB9 Q8TBX8 Q92835 Q9BTU6 Q9NTJ5 Q9NZT1	under	0.805959	0.992878	0.05
hsa05221	Acute myeloid leukemia	1	323	20	4113	0.003096	0.004863	P42229	P01111 P01112 P01116 P05164 P08571 P11215 P14923 P19838 P27361 P28482 P29590 P31749 P31751 P36507 P40763 P42229 P42345 P62993 Q02750 Q04206	under	0.805959	0.992878	0.05
hsa05200	Pathways in cancer	8	323	130	4113	0.024768	0.031607	P08754 P10145 P14780 P14784 P42224 P42229 Q14344 Q92888	O14880 O15217 O15230 O75116 O75582 P00533 P00734 P01042 P01111 P01112 P01116 P01344 P02462 P02751 P03956 P04899 P05556 P06753 P06756 P07900 P07942 P07954 P08238 P08253 P08514 P08572 P08754 P09038 P09211 P09488 P09601 P09619 P0DP23 P10145 P10620 P11047 P11166 P11233 P11234 P12270 P12830 P14625 P14780 P14784 P14923 P15153 P15559 P16885 P17252 P17301 P17612 P19793 P19838 P21266 P22694 P23229 P24043 …	under	0.813336	0.992878	0.0615385
hsa00030	Pentose phosphate pathway	1	323	21	4113	0.003096	0.005106	Q9Y315	O95336 O95479 P04075 P06744 P08237 P09467 P09972 P11413 P11908 P17858 P29401 P36871 P37837 P49247 P52209 P60891 Q01813 Q96AT9 Q96G03 Q9UHJ6 Q9Y315	under	0.821271	0.992878	0.047619
hsa00051	Fructose and mannose metabolism	1	323	21	4113	0.003096	0.005106	O60218	C9JRZ8 O15305 O60218 O60547 P04075 P08237 P09467 P09972 P15121 P17858 P19367 P34949 P52790 P60174 Q00796 Q01813 Q13630 Q16875 Q3LXA3 Q96IJ6 Q9Y5P6	under	0.821271	0.992878	0.047619
hsa04064	NF-kappa B signaling pathway	1	323	21	4113	0.003096	0.005106	P10145	O00585 P05362 P07948 P08571 P09874 P10145 P16885 P18428 P19784 P19838 P43405 P48061 P63279 P67870 P68400 Q00653 Q04206 Q14258 Q15628 Q8IUD2 Q8WUF5	under	0.821271	0.992878	0.047619
hsa04216	Ferroptosis	1	323	21	4113	0.003096	0.005106	P08195	A6NCE7 O95352 P00450 P02786 P02787 P02792 P02794 P04156 P04839 P08195 P09601 P33121 P36969 P45880 P48506 P48637 Q15043 Q15365 Q15366 Q9H492 Q9Y277	under	0.821271	0.992878	0.047619
hsa04924	Renin secretion	1	323	21	4113	0.003096	0.005106	P08754	P04899 P07858 P08754 P0DP23 P12821 P16220 P16298 P17612 P22694 P27482 P29972 P48454 P50148 P63092 P63096 P63098 Q08209 Q14573 Q14CN2 Q9NZT1 Q9UQC9	under	0.821271	0.992878	0.047619
hsa05212	Pancreatic cancer	1	323	21	4113	0.003096	0.005106	P42224	P00533 P01116 P11233 P11234 P15153 P19838 P27361 P28482 P31749 P31751 P40763 P42224 P42345 P42771 P60953 P63000 Q00534 Q02750 Q04206 Q07812 Q92466	under	0.821271	0.992878	0.047619
hsa04932	Non-alcoholic fatty liver disease	4	323	72	4113	0.012384	0.017505	P07919 P10145 P15954 Q16539	O00217 O00483 O14561 O14949 O14957 O15239 O15264 O43181 O43674 O43676 O43677 O43678 O43920 O75306 O75380 O75438 O75489 O95167 O95168 O95182 O95299 O96000 P00403 P00414 P05198 P07919 P08574 P09669 P10145 P10606 P12074 P13073 P14406 P14854 P14927 P15954 P17568 P19404 P19793 P19838 P20674 P21912 P22695 P28331 P31040 P31749 P31751 P31930 P42574 P47985 P49821 P51970 P55210 P55957 P56181 P56556 P60953 …	under	0.828916	0.992878	0.0555556
hsa04371	Apelin signaling pathway	2	323	40	4113	0.006192	0.009725	P08754 Q14344	A6NCE7 O60240 P01111 P01112 P01116 P04899 P08754 P0DP23 P10301 P12830 P17612 P19634 P22694 P27361 P27482 P28482 P31749 P31751 P36507 P42345 P50148 P50151 P59768 P62070 P62753 P62873 P62879 P63096 P63218 Q00059 Q02750 Q05469 Q14344 Q14573 Q15746 Q8NEB9 Q9H492 Q9HAV0 Q9NZT1 Q9UBI6	under	0.834053	0.992878	0.05
hsa00240	Pyrimidine metabolism	1	323	22	4113	0.003096	0.005349	P17812	O14638 P11172 P15531 P17812 P19971 P21589 P22392 P23919 P23921 P27708 P30085 P32320 P32321 P33316 P49902 P49961 P50583 Q13232 Q7Z4H3 Q8TCD5 Q9H0P0 Q9H773	under	0.835379	0.992878	0.0454545
hsa04390	Hippo signaling pathway	1	323	22	4113	0.003096	0.005349	P02771	P02771 P05107 P12830 P27348 P30153 P31946 P35221 P35222 P36873 P46937 P60709 P61981 P62136 P62140 P62258 P63104 P63151 P67775 Q04917 Q12959 Q14160 Q7L9L4	under	0.835379	0.992878	0.0454545
hsa04916	Melanogenesis	1	323	22	4113	0.003096	0.005349	P08754	P01111 P01112 P01116 P04899 P08754 P0DP23 P16220 P17252 P17612 P22694 P27361 P27482 P28482 P35222 P36507 P50148 P63092 P63096 Q02750 Q13555 Q13557 Q9NZT1	under	0.835379	0.992878	0.0454545
hsa04925	Aldosterone synthesis and secretion	1	323	22	4113	0.003096	0.005349	P20020	P05023 P05026 P0DP23 P14060 P16220 P17252 P17612 P20020 P22694 P23634 P27482 P29992 P50148 P54709 P63092 Q05469 Q13555 Q13557 Q14012 Q14573 Q8IU85 Q9NZT1	under	0.835379	0.992878	0.0454545
hsa04971	Gastric acid secretion	1	323	22	4113	0.003096	0.005349	P08754	P00918 P04899 P05023 P05026 P08754 P0DP23 P15311 P17252 P17612 P19634 P22694 P27482 P50148 P54709 P60709 P63092 P63096 Q13555 Q13557 Q14573 Q15746 Q9NZT1	under	0.835379	0.992878	0.0454545
hsa05220	Chronic myeloid leukemia	1	323	22	4113	0.003096	0.005349	P42229	P01111 P01112 P01116 P19838 P27361 P28482 P31749 P31751 P36507 P42229 P42771 P46108 P46109 P62993 Q00534 Q02750 Q04206 Q06124 Q07812 Q13363 Q92466 Q92769	under	0.835379	0.992878	0.0454545
hsa05012	Parkinson disease	9	323	149	4113	0.027864	0.036227	P00441 P05141 P07919 P08754 P10599 P12235 P15954 P30049 P62979	O00217 O00231 O00232 O00233 O00483 O00487 O14561 O14818 O14933 O14949 O14957 O15239 O43181 O43242 O43464 O43674 O43676 O43677 O43678 O43920 O75306 O75380 O75438 O75489 O75947 O95167 O95168 O95182 O95299 O96000 P00403 P00414 P00441 P03928 P04350 P04899 P05141 P05198 P05496 P06576 P07437 P07919 P08574 P08754 P09669 P09936 P0DP23 P0DPH7 P10599 P10606 P10636 P11021 P12074 P12235 P12236 P13073 P14406 …	under	0.840066	0.992878	0.0604027
hsa04150	mTOR signaling pathway	2	323	41	4113	0.006192	0.009968	P08195 P21283	O43504 O60573 O75348 P01111 P01112 P01116 P06730 P08195 P17252 P21281 P21283 P23588 P27361 P28482 P30622 P31749 P31751 P36507 P36543 P38606 P42345 P51812 P55735 P61586 P62753 P62993 Q02750 Q0VGL1 Q15382 Q15418 Q16864 Q6IAA8 Q7L523 Q96EE3 Q9H9S4 Q9HB90 Q9UHA4 Q9UI12 Q9Y2Q5 Q9Y376 Q9Y5K8	under	0.844221	0.992878	0.0487805
hsa05160	Hepatitis C	2	323	41	4113	0.006192	0.009968	P42224 P61289	O95832 P00533 P01111 P01112 P01116 P05198 P19525 P19793 P19838 P20591 P20592 P27348 P27361 P28482 P30153 P31749 P31751 P31946 P35222 P36507 P40763 P42224 P42574 P55957 P60033 P60228 P61289 P61981 P62258 P62993 P63104 P63151 P67775 P99999 Q00534 Q02750 Q04206 Q04917 Q07812 Q13158 Q15628	under	0.844221	0.992878	0.0487805
hsa00970	Aminoacyl-tRNA biosynthesis	1	323	23	4113	0.003096	0.005592	P26639	O43716 O43776 P07814 P12081 P14868 P23381 P26639 P26640 P41250 P41252 P47897 P49588 P49589 P49591 P54136 P54577 P56192 Q15046 Q9NP81 Q9NSD9 Q9NSE4 Q9P2J5 Q9Y285	under	0.848377	0.992878	0.0434783
hsa04012	ErbB signaling pathway	1	323	23	4113	0.003096	0.005592	P42229	P00533 P01111 P01112 P01116 P16333 P16885 P17252 P27361 P28482 P31749 P31751 P36507 P42229 P42345 P45985 P46108 P46109 P62993 Q02750 Q05397 Q13177 Q13555 Q13557	under	0.848377	0.992878	0.0434783
hsa05215	Prostate cancer	1	323	23	4113	0.003096	0.005592	P14780	O43278 P00533 P01111 P01112 P01116 P07900 P08238 P09211 P09619 P14625 P14780 P16220 P19838 P27361 P28482 P31749 P31751 P35222 P36507 P42345 P62993 Q02750 Q04206	under	0.848377	0.992878	0.0434783
hsa04921	Oxytocin signaling pathway	2	323	42	4113	0.006192	0.010212	O60237 P08754	O14974 O60237 O75116 P00533 P01111 P01112 P01116 P04899 P08754 P0DP23 P13639 P16298 P17252 P17612 P22694 P24844 P27361 P27482 P28482 P36507 P36873 P47712 P48454 P50148 P54289 P60660 P60709 P61586 P62136 P62140 P63092 P63096 P63098 Q02750 Q08209 Q13555 Q13557 Q14012 Q14573 Q15746 Q8IU85 Q9NZT1	under	0.853821	0.992878	0.047619
hsa04979	Cholesterol metabolism	1	323	24	4113	0.003096	0.005835	O15118	O15118 O95292 P02647 P02649 P02652 P02654 P02655 P02656 P02749 P04114 P04180 P06727 P08519 P16671 P30533 P30536 P35610 P38571 P45880 P55058 Q07954 Q59FG2 Q9P0L0 Q9Y277	under	0.860351	0.992878	0.0416667
hsa05416	Viral myocarditis	1	323	24	4113	0.003096	0.005835	O43432	O43432 P01889 P01903 P01909 P01911 P04439 P04440 P05107 P05362 P08174 P10321 P11532 P15153 P24043 P42574 P55957 P60709 P63000 P78344 P99999 Q03135 Q04637 Q13425 Q14118	under	0.860351	0.992878	0.0416667
hsa04728	Dopaminergic synapse	2	323	43	4113	0.006192	0.010455	P08754 Q16539	O15264 P04899 P08754 P0DP23 P16220 P16298 P17252 P17612 P21397 P21964 P22694 P27338 P27482 P30153 P31749 P31751 P32121 P33176 P36873 P48454 P49407 P50148 P50151 P59768 P62136 P62140 P62873 P62879 P63092 P63096 P63151 P63218 P67775 Q08209 Q13555 Q13557 Q14573 Q14738 Q16539 Q9HAV0 Q9NZT1 Q9UBI6 Q9UD71	under	0.86288	0.992878	0.0465116
hsa04370	VEGF signaling pathway	1	323	25	4113	0.003096	0.006078	Q16539	O15264 P01111 P01112 P01116 P04792 P15153 P16298 P16885 P17252 P27361 P28482 P31749 P31751 P36507 P47712 P48454 P49023 P60953 P63000 P63098 Q02750 Q05397 Q08209 Q16539 Q16644	under	0.871382	0.992878	0.04
hsa04713	Circadian entrainment	1	323	25	4113	0.003096	0.006078	P08754	O75582 P04899 P08754 P0DP23 P16220 P17252 P17612 P22694 P27361 P27482 P28482 P50148 P50151 P59768 P62873 P62879 P63092 P63096 P63218 Q13555 Q13557 Q14573 Q9HAV0 Q9NZT1 Q9UBI6	under	0.871382	0.992878	0.04
hsa04962	Vasopressin-regulated water reabsorption	1	323	25	4113	0.003096	0.006078	P46459	O00399 O43237 P16220 P17612 P20339 P22694 P46459 P51148 P52565 P52566 P61020 P62491 P63027 P63092 P63167 Q12846 Q13409 Q13561 Q14203 Q14204 Q15907 Q8NCM8 Q96FJ2 Q9UJW0 Q9Y6G9	under	0.871382	0.992878	0.04
hsa05110	Vibrio cholerae infection	1	323	25	4113	0.003096	0.006078	P21283	O75348 P13667 P16885 P17252 P17612 P21281 P21283 P22694 P24390 P36543 P38606 P55011 P60059 P60468 P60709 P61421 P63092 Q07157 Q13488 Q15904 Q16864 Q93050 Q96HE7 Q9UI12 Q9Y5K8	under	0.871382	0.992878	0.04
hsa05223	Non-small cell lung cancer	1	323	25	4113	0.003096	0.006078	P42229	P00533 P01111 P01112 P01116 P16885 P17252 P19793 P27361 P28482 P28702 P31749 P31751 P33176 P36507 P40763 P42229 P42771 P49789 P62993 Q00534 Q02750 Q07812 Q13043 Q92466 Q9HC35	under	0.871382	0.992878	0.04
hsa04066	HIF-1 signaling pathway	2	323	44	4113	0.006192	0.010698	P00338 P07205	O60573 P00338 P00533 P00558 P01033 P02786 P02787 P04075 P04406 P04839 P06730 P06733 P07195 P07205 P08237 P08559 P09104 P09601 P09972 P11166 P11177 P16885 P17252 P17858 P19367 P19838 P27361 P28482 P31749 P31751 P36507 P40763 P42345 P52790 P62753 Q01813 Q02750 Q04206 Q13555 Q13557 Q13617 Q15369 Q15370 Q16875	under	0.871423	0.992878	0.0454545
hsa04360	Axon guidance	2	323	44	4113	0.006192	0.010698	P07332 P08754	O14639 O14786 O14950 O15031 O75094 O75116 P01111 P01112 P01116 P04899 P05556 P07332 P08754 P10301 P15153 P16298 P16333 P16885 P17252 P23528 P24844 P27361 P28482 P29320 P32004 P48061 P48454 P60953 P61586 P63000 P63096 P63098 Q05397 Q06124 Q08209 Q13177 Q13214 Q13418 Q13555 Q13557 Q16555 Q8N8S7 Q8TE77 Q9UBN4	under	0.871423	0.992878	0.0454545
hsa04514	Cell adhesion molecules	2	323	44	4113	0.006192	0.010698	P19256 Q12860	O75144 O95832 P01889 P01903 P01909 P01911 P04439 P04440 P05107 P05362 P05556 P06756 P08575 P10321 P11215 P12830 P13611 P14209 P16150 P16284 P18827 P19256 P22223 P23229 P25189 P28906 P31431 P32004 P32942 P34741 Q12860 Q13332 Q13740 Q15223 Q5ZPR3 Q7Z3B1 Q8N126 Q8TCZ2 Q92692 Q92896 Q9BY67 Q9BZZ2 Q9H156 Q9Y624	under	0.871423	0.992878	0.0454545
hsa00020	Citrate cycle (TCA cycle)	1	323	26	4113	0.003096	0.006321	Q02218	O43837 O75390 O75874 P07954 P08559 P09622 P10515 P11177 P11498 P21399 P21912 P31040 P36957 P40925 P40926 P48735 P50213 P51553 P53396 P53597 Q02218 Q16822 Q96I99 Q99643 Q99798 Q9P2R7	under	0.881544	0.992878	0.0384615
hsa04662	B cell receptor signaling pathway	1	323	26	4113	0.003096	0.006321	O75023	O75023 P01111 P01112 P01116 P07948 P15153 P15498 P16298 P16885 P19838 P27361 P28482 P29350 P31749 P31751 P36507 P43405 P48454 P60033 P62993 P63000 P63098 Q02750 Q04206 Q08209 Q92835	under	0.881544	0.992878	0.0384615
hsa05231	Choline metabolism in cancer	1	323	26	4113	0.003096	0.006321	P42768	O14495 O75608 P00533 P01111 P01112 P01116 P09619 P15153 P17252 P23743 P27361 P28482 P31749 P31751 P36507 P42345 P42768 P47712 P49585 P62993 P63000 Q02750 Q15382 Q8IWA5 Q8WWI5 Q9Y6W5	under	0.881544	0.992878	0.0384615
hsa04010	MAPK signaling pathway	3	323	63	4113	0.009288	0.015317	P21333 P51452 Q16539	O15264 O75582 O75688 P00533 P01111 P01112 P01116 P01344 P04792 P08571 P09038 P09619 P0DMV8 P10301 P10636 P11142 P15153 P16298 P16949 P17066 P17252 P17612 P19838 P21333 P22694 P27361 P28482 P31749 P31751 P32121 P35813 P36507 P42574 P45985 P46108 P46109 P47712 P48454 P49407 P51452 P51812 P53041 P54289 P60953 P61244 P62070 P62834 P62993 P63000 P63098 Q00653 Q02750 Q04206 Q08209 Q13043 Q13177 Q15418 …	under	0.883004	0.992878	0.047619
hsa05169	Epstein-Barr virus infection	3	323	63	4113	0.009288	0.015317	P19256 P42224 Q16539	O00231 O00232 O00487 O15264 O15533 O43242 O60603 P01889 P01903 P01909 P01911 P04439 P04440 P05161 P05362 P07948 P08670 P10321 P16070 P16885 P17980 P19256 P19525 P19838 P27797 P30101 P31749 P31751 P35998 P40763 P42224 P42574 P43405 P43686 P45985 P48556 P49961 P51665 P55036 P55957 P61769 P62191 P62195 P62333 P63000 P99999 Q00534 Q00653 Q03519 Q04206 Q07812 Q13158 Q13200 Q15008 Q15628 Q16186 Q16539 …	under	0.883004	0.992878	0.047619
hsa00071	Fatty acid degradation	1	323	27	4113	0.003096	0.006565	P05091	O75521 P00325 P00326 P05091 P09110 P11310 P11766 P16219 P23786 P24752 P30084 P30837 P33121 P40939 P42126 P42765 P45954 P49189 P49419 P49748 P51648 P55084 Q15067 Q16836 Q92947 Q96GR2 Q9BWD1	under	0.890906	0.992878	0.037037
hsa04725	Cholinergic synapse	1	323	27	4113	0.003096	0.006565	P08754	P01111 P01112 P01116 P04899 P08754 P16220 P17252 P17612 P22694 P27361 P28482 P29992 P31749 P31751 P50148 P50151 P59768 P62873 P62879 P63096 P63218 Q02750 Q13555 Q13557 Q14573 Q9HAV0 Q9UBI6	under	0.890906	0.992878	0.037037
hsa05022	Pathways of neurodegeneration - multiple diseases	12	323	206	4113	0.037152	0.050085	P00441 P05141 P07919 P12235 P15954 P16615 P30049 P41219 P62979 Q16539 Q93084 Q99720	A6NCE7 O00217 O00231 O00232 O00233 O00291 O00399 O00483 O00487 O14561 O14618 O14818 O14933 O14949 O14957 O15020 O15239 O15264 O43181 O43242 O43464 O43674 O43676 O43677 O43678 O43920 O75306 O75380 O75438 O75489 O75935 O75947 O95167 O95168 O95182 O95292 O95299 O96000 O96008 P00403 P00414 P00441 P01111 P01112 P01116 P03928 P04040 P04156 P04350 P04839 P05067 P05141 P05198 P05496 P06576 P07203 P07384 …	under	0.897292	0.992878	0.0582524
hsa04912	GnRH signaling pathway	1	323	28	4113	0.003096	0.006808	Q16539	O15264 P00533 P01111 P01112 P01116 P08253 P0DP23 P17252 P17612 P22694 P27361 P27482 P28482 P29992 P36507 P45985 P47712 P50148 P50281 P60953 P62993 P63092 Q02750 Q13555 Q13557 Q14573 Q16539 Q9NZT1	under	0.89953	0.992878	0.0357143
hsa05134	Legionellosis	1	323	28	4113	0.003096	0.006808	P10145	O60603 O75396 P01024 P05107 P08571 P0DMV8 P10145 P10809 P11142 P11215 P17066 P19838 P26641 P29466 P42574 P55210 P62820 P68104 P99999 Q00653 Q04206 Q05639 Q14116 Q9BXK5 Q9H0U4 Q9NR31 Q9ULZ3 Q9Y6B6	under	0.89953	0.992878	0.0357143
hsa03040	Spliceosome	4	323	84	4113	0.012384	0.020423	P09651 P17844 P52272 Q99459	O14776 O43143 O43447 O60231 O60306 O75494 O75533 O75643 O75934 O94906 O95777 P07910 P08579 P08621 P09012 P09234 P09651 P09661 P0DMV8 P11142 P14678 P17066 P17844 P26368 P35637 P38159 P38919 P41223 P49756 P51991 P52272 P55769 P61326 P61978 P62304 P62306 P62310 P62312 P62314 P62316 P62318 P62995 P84103 Q00839 Q01081 Q01130 Q07955 Q09161 Q12874 Q13242 Q13243 Q13247 Q13435 Q13595 Q13838 Q15029 Q15365 …	under	0.906302	0.992878	0.047619
hsa04512	ECM-receptor interaction	2	323	49	4113	0.006192	0.011913	Q13683 Q9UQP3	A6NMZ7 A8TX70 O00468 O15230 P02452 P02458 P02462 P02751 P04004 P04275 P05106 P05556 P06756 P07942 P07996 P08123 P08514 P08572 P08648 P11047 P12109 P12110 P12111 P14770 P16070 P16144 P16671 P17301 P18084 P18564 P18827 P22105 P23229 P24043 P24821 P26006 P31431 P35442 P49746 P49747 P55268 P56199 P98160 Q08722 Q13683 Q14118 Q16363 Q9HCN6 Q9UQP3	under	0.907245	0.992878	0.0408163
hsa04310	Wnt signaling pathway	1	323	30	4113	0.003096	0.007294	Q9BZK7	O75116 P15153 P16298 P17252 P17612 P19784 P22694 P35222 P36955 P48454 P48729 P61586 P63000 P63098 P63208 P67870 P68400 Q08209 Q13363 Q13555 Q13557 Q13616 Q8N163 Q8N474 Q92765 Q96HF1 Q9BZK7 Q9HB71 Q9NSA3 Q9Y265	under	0.914792	0.992878	0.0333333
hsa04650	Natural killer cell mediated cytotoxicity	1	323	30	4113	0.003096	0.007294	P30273	P01111 P01112 P01116 P01889 P04439 P05107 P05362 P08637 P10144 P10321 P15153 P15498 P16298 P16885 P17252 P27361 P28482 P29350 P30273 P36507 P42574 P43405 P48454 P55957 P62993 P63000 P63098 Q02750 Q06124 Q08209	under	0.914792	0.992878	0.0333333
hsa00190	Oxidative phosphorylation	4	323	86	4113	0.012384	0.020909	P07919 P15954 P21283 P30049	O00217 O00483 O14561 O14949 O14957 O15239 O43181 O43674 O43676 O43677 O43678 O43920 O75306 O75348 O75380 O75438 O75489 O75947 O75964 O95167 O95168 O95182 O95299 O96000 P00403 P00414 P03928 P05496 P06576 P07919 P08574 P09669 P10606 P12074 P13073 P14406 P14854 P14927 P15954 P17568 P18859 P19404 P20674 P21281 P21283 P21912 P22695 P24539 P25705 P28331 P30049 P31040 P31930 P36542 P36543 P38606 P47985 …	under	0.915649	0.992878	0.0465116
hsa05165	Human papillomavirus infection	5	323	104	4113	0.01548	0.025286	P14618 P21283 P42224 Q13683 Q9UQP3	A6NMZ7 A8TX70 O14745 O15230 O75348 P00533 P01111 P01112 P01116 P01889 P02452 P02458 P02462 P02751 P04004 P04275 P04439 P05106 P05161 P05556 P06756 P07942 P07996 P08123 P08514 P08572 P08648 P09619 P10321 P11047 P12109 P12110 P12111 P14618 P16144 P16220 P17301 P17612 P18084 P18564 P19525 P19838 P20591 P20592 P21281 P21283 P22105 P22694 P23229 P23258 P24043 P24821 P26006 P27361 P28482 P30153 P31749 …	under	0.92092	0.992878	0.0480769
hsa03018	RNA degradation	1	323	31	4113	0.003096	0.007537	Q9H0D6	A5YKK6 O15116 O95777 P06733 P08237 P09104 P10809 P11940 P17858 P26196 P38646 P42285 P62310 P62312 Q01780 Q01813 Q13310 Q13868 Q15024 Q6PGP7 Q92600 Q96C86 Q96DE0 Q9GZS3 Q9H0D6 Q9NPD3 Q9UIV1 Q9UK45 Q9Y2L1 Q9Y333 Q9Y4Z0	under	0.921533	0.992878	0.0322581
hsa04540	Gap junction	1	323	31	4113	0.003096	0.007537	P08754	P00533 P01111 P01112 P01116 P04350 P04899 P07437 P08754 P09619 P0DPH7 P17252 P17302 P17612 P22694 P27361 P28482 P29992 P36507 P50148 P62993 P63092 P63096 P68366 P68371 Q02750 Q07157 Q13509 Q13885 Q14573 Q9BQE3 Q9BUF5	under	0.921533	0.992878	0.0322581
hsa04660	T cell receptor signaling pathway	1	323	31	4113	0.003096	0.007537	Q16539	O15264 P01111 P01112 P01116 P08575 P15498 P16298 P16333 P19838 P27361 P28482 P29350 P30153 P31749 P31751 P36507 P48454 P60953 P61586 P62993 P63098 P63151 P67775 Q02750 Q04206 Q06124 Q08209 Q12959 Q13177 Q14738 Q16539	under	0.921533	0.992878	0.0322581
hsa05207	Chemical carcinogenesis - receptor activation	2	323	52	4113	0.006192	0.012643	P08754 P42229	O00170 O00629 O14880 O15217 O60684 P00533 P01111 P01112 P01116 P04899 P07099 P07900 P08238 P08754 P09038 P09488 P10620 P14625 P16220 P17252 P17612 P19793 P19838 P21266 P22694 P27361 P28161 P28482 P28702 P30711 P31749 P31751 P32121 P34913 P36507 P40763 P42229 P42345 P46439 P49407 P51812 P62993 P63092 P63096 P78417 Q02750 Q03013 Q04206 Q04721 Q14974 Q15185 Q15418	under	0.924022	0.992878	0.0384615
hsa04723	Retrograde endocannabinoid signaling	2	323	53	4113	0.006192	0.012886	P08754 Q16539	O00217 O00483 O14561 O15239 O15264 O43181 O43674 O43676 O43677 O43678 O43920 O75306 O75380 O75438 O75489 O95167 O95168 O95182 O95299 O96000 P04899 P08754 P17252 P17568 P17612 P19404 P22694 P27361 P28331 P28482 P49821 P50148 P50151 P51970 P56181 P56556 P59768 P62873 P62879 P63096 P63218 Q14573 Q16539 Q16718 Q16795 Q86Y39 Q99685 Q9HAV0 Q9NX14 Q9P0J0 Q9UBI6 Q9UI09 Q9Y6M9	under	0.928949	0.992878	0.0377358
hsa05170	Human immunodeficiency virus 1 infection	3	323	72	4113	0.009288	0.017505	P08754 Q16539 Q9Y3Z3	O15264 O15533 O43747 O60603 P01111 P01112 P01116 P01889 P04439 P04899 P08754 P0DP23 P10321 P15153 P16298 P16885 P17252 P19838 P23528 P27361 P27482 P27797 P28482 P29992 P30101 P31749 P31751 P36507 P42345 P42574 P46108 P46109 P48454 P49023 P50148 P50151 P55957 P59768 P61769 P61966 P62873 P62879 P63000 P63096 P63098 P63208 P63218 P99999 Q02750 Q03519 Q04206 Q05397 Q07812 Q08209 Q10567 Q13158 Q13177 …	under	0.93049	0.992878	0.0416667
hsa04110	Cell cycle	1	323	33	4113	0.003096	0.008023	P33992	O43684 O60216 P12004 P25205 P27348 P30153 P31946 P31947 P33991 P33992 P33993 P42771 P42773 P49736 P61981 P62258 P63104 P63208 P67775 P78527 Q00534 Q04917 Q13616 Q14566 Q14683 Q14738 Q29RF7 Q8N3U4 Q8NHZ8 Q92769 Q9BS18 Q9NTI5 Q9UQE7	under	0.933461	0.992878	0.030303
hsa04137	Mitophagy - animal	1	323	33	4113	0.003096	0.008023	P62979	A6NCE7 O60238 O60313 O75431 O94826 O96008 P01111 P01112 P01116 P05198 P10301 P19784 P20339 P51148 P51149 P60520 P61020 P62070 P62979 P67870 P68400 Q04206 Q7Z6Z7 Q8IXI1 Q8TC07 Q96CV9 Q99623 Q9BXK5 Q9H492 Q9HA65 Q9Y3D6 Q9Y4E8 Q9Y512	under	0.933461	0.992878	0.030303
hsa05168	Herpes simplex virus 1 infection	2	323	55	4113	0.006192	0.013372	P04233 P42224	O15533 O60603 O75467 P01024 P01031 P01889 P01903 P01909 P01911 P04233 P04439 P04440 P05106 P05198 P08648 P10321 P19525 P19838 P23497 P27797 P27918 P29590 P30101 P31749 P31751 P36873 P42224 P42345 P42574 P43405 P51610 P55957 P61769 P62136 P62140 P84103 P99999 Q01130 Q03519 Q04206 Q06124 Q07812 Q07955 Q13158 Q13242 Q13243 Q13247 Q14232 Q15223 Q15382 Q15628 Q16629 Q86V81 Q92692 Q96SB4	under	0.937914	0.992878	0.0363636
hsa04722	Neurotrophin signaling pathway	1	323	34	4113	0.003096	0.008266	Q16539	O15264 O75582 P01111 P01112 P01116 P0DP23 P16885 P19838 P27361 P27482 P28482 P31749 P31751 P36507 P46108 P46109 P51812 P52565 P52566 P60953 P61586 P62258 P62834 P62993 P63000 Q02750 Q04206 Q06124 Q07812 Q13555 Q13557 Q15418 Q16539 Q9NZT1	under	0.938728	0.992878	0.0294118
hsa04114	Oocyte meiosis	1	323	38	4113	0.003096	0.009239	Q16539	O15264 P0DP23 P16298 P17612 P22694 P27348 P27361 P27482 P28482 P30153 P31946 P36873 P48454 P51812 P61981 P62136 P62140 P62258 P63098 P63104 P63208 P67775 Q02750 Q04917 Q08209 Q13555 Q13557 Q13616 Q14573 Q14683 Q14738 Q15418 Q16539 Q8NHZ8 Q9BS18 Q9H2G2 Q9NZT1 Q9UQE7	under	0.955955	0.992878	0.0263158
hsa03015	mRNA surveillance pathway	1	323	39	4113	0.003096	0.009482	O43809	O00422 O43809 O94913 P11940 P15170 P30153 P33240 P35637 P36873 P38919 P61326 P62136 P62140 P62495 P63151 P67775 Q09161 Q12996 Q13148 Q13310 Q13838 Q14738 Q15287 Q16630 Q6UN15 Q6UXN9 Q86U42 Q86V81 Q8IYB3 Q8IYD1 Q8N684 Q92900 Q96EP5 Q9BRP8 Q9H307 Q9NUU7 Q9UKF6 Q9UKV3 Q9Y5S9	under	0.959447	0.992878	0.025641
hsa05322	Systemic lupus erythematosus	1	323	39	4113	0.003096	0.009482	P12814	O43707 O60814 O75367 P00736 P01024 P01031 P01903 P01909 P01911 P02745 P02746 P02747 P02748 P04440 P05455 P06681 P07357 P07358 P07360 P08246 P08311 P08637 P09871 P0C0L4 P0C0S5 P0C0S8 P10155 P10643 P12814 P13671 P14678 P62314 P62318 P62805 P68431 Q8IUE6 Q8N257 Q96A08 Q9P0M6	under	0.959447	0.992878	0.025641
hsa04141	Protein processing in endoplasmic reticulum	3	323	82	4113	0.009288	0.019937	O60884 P54727 Q8IXB1	O60884 O76024 O94855 O94979 O95487 O95816 P02511 P04843 P04844 P05198 P07237 P07384 P07900 P08238 P0DMV8 P11021 P11142 P13667 P14314 P14625 P17066 P17655 P25685 P25686 P27797 P27824 P30040 P30101 P31689 P39656 P43307 P46977 P49257 P51571 P51572 P53992 P54725 P54727 P55735 P60059 P60468 P61803 P63208 Q04323 Q07065 Q07812 Q12907 Q13217 Q13616 Q13724 Q14697 Q15084 Q15436 Q15437 Q15629 Q8IXB1 Q8NBS9 …	under	0.962087	0.992878	0.0365854
hsa03050	Proteasome	1	323	40	4113	0.003096	0.009725	P61289	O00231 O00232 O00233 O00487 O14818 O43242 P17980 P20618 P25786 P25787 P25788 P25789 P28062 P28065 P28066 P28070 P28072 P28074 P35998 P40306 P43686 P48556 P49720 P49721 P51665 P55036 P60900 P61289 P62191 P62195 P62333 Q06323 Q13200 Q15008 Q16186 Q92530 Q99436 Q99460 Q9UL46 Q9UNM6	under	0.962662	0.992878	0.025
hsa05014	Amyotrophic lateral sclerosis	9	323	187	4113	0.027864	0.045466	P00441 P07919 P09651 P15954 P30049 P41219 Q16539 Q8NFH3 Q99720	A6NCE7 O00217 O00231 O00232 O00233 O00399 O00483 O00487 O14561 O14618 O14818 O14949 O14957 O15239 O15264 O43181 O43242 O43674 O43676 O43677 O43678 O43920 O75306 O75380 O75438 O75489 O75694 O75935 O75947 O95167 O95168 O95182 O95292 O95299 O96000 O96008 P00403 P00414 P00441 P03928 P03950 P04040 P04350 P05198 P05496 P06576 P07203 P07437 P07737 P07919 P08574 P09651 P09669 P0DPH7 P10606 P11021 P12074 …	under	0.96497	0.992878	0.0481283
hsa04714	Thermogenesis	4	323	102	4113	0.012384	0.024799	P07919 P15954 P30049 Q16539	O00217 O00483 O14561 O14949 O14957 O15239 O15264 O43181 O43674 O43676 O43677 O43678 O43920 O60240 O60341 O75306 O75380 O75438 O75489 O75947 O75964 O95167 O95168 O95182 O95299 O96000 O96019 P00403 P00414 P01111 P01112 P01116 P03928 P05496 P06576 P07919 P08574 P09669 P10606 P12074 P13073 P14406 P14854 P14927 P15954 P16220 P17568 P17612 P18859 P19404 P20674 P21912 P22694 P22695 P23786 P24539 P25705 …	under	0.965082	0.992878	0.0392157
hsa05034	Alcoholism	1	323	41	4113	0.003096	0.009968	P08754	O60814 O75367 P01111 P01112 P01116 P04899 P08754 P0C0S5 P0C0S8 P0DP23 P16220 P17612 P21397 P22694 P27338 P27361 P27482 P28482 P36873 P50151 P59768 P62136 P62140 P62805 P62873 P62879 P62993 P63092 P63096 P63218 P68431 Q02750 Q8IUE6 Q8N257 Q92769 Q96A08 Q9HAV0 Q9NZT1 Q9P0M6 Q9UBI6 Q9UD71	under	0.965623	0.992878	0.0243902
hsa05171	Coronavirus disease - COVID-19	5	323	124	4113	0.01548	0.030148	P00488 P10145 P42224 P62979 Q16539	O14786 O15264 O60603 P00488 P00533 P00734 P00736 P00746 P00751 P01024 P01031 P02671 P02675 P02679 P02745 P02746 P02747 P02748 P03956 P04275 P04839 P05161 P05386 P05387 P05388 P06681 P07357 P07358 P07360 P08708 P08865 P09871 P0C0L4 P10145 P10643 P12821 P13671 P15880 P16885 P17252 P18077 P18124 P18621 P19525 P19838 P20591 P20592 P23396 P25398 P26373 P27361 P27635 P28482 P29466 P30050 P32969 P35268 …	under	0.97203	0.994007	0.0403226
hsa05020	Prion disease	7	323	162	4113	0.021672	0.039387	P00441 P05141 P07919 P12235 P15954 P30049 Q16539	O00217 O00231 O00232 O00233 O00483 O00487 O14561 O14818 O14949 O14957 O15239 O15264 O43181 O43242 O43674 O43676 O43677 O43678 O43920 O75306 O75380 O75438 O75489 O75947 O95167 O95168 O95182 O95299 O96000 P00403 P00414 P00441 P01031 P02745 P02746 P02747 P02748 P03928 P04156 P04350 P04839 P05141 P05198 P05496 P06576 P07357 P07358 P07360 P07437 P07919 P08574 P09669 P0DMV8 P0DPH7 P10606 P10643 P11021 …	under	0.976222	0.994007	0.0432099
hsa04151	PI3K-Akt signaling pathway	3	323	93	4113	0.009288	0.022611	P14784 Q13683 Q9UQP3	A6NMZ7 A8TX70 O15230 O60573 O60603 P00533 P01111 P01112 P01116 P01344 P02452 P02458 P02462 P02751 P04004 P04275 P05106 P05556 P06730 P06756 P07900 P07942 P07996 P08123 P08238 P08514 P08572 P08648 P09038 P09619 P11047 P12109 P12110 P12111 P13807 P14625 P14784 P16144 P16220 P17252 P17301 P18084 P18564 P19793 P19838 P22105 P23229 P23588 P24043 P24821 P26006 P27348 P27361 P28482 P30153 P31749 P31751 …	under	0.981068	0.994007	0.0322581
hsa05010	Alzheimer disease	7	323	172	4113	0.021672	0.041819	P05141 P07919 P12235 P15954 P16615 P30049 Q93084	O00217 O00231 O00232 O00233 O00483 O00487 O14561 O14672 O14818 O14949 O14957 O15239 O43181 O43242 O43674 O43676 O43677 O43678 O43920 O75306 O75380 O75438 O75489 O75947 O95167 O95168 O95182 O95197 O95299 O96000 P00403 P00414 P01111 P01112 P01116 P02649 P03928 P04350 P04406 P04839 P05067 P05141 P05198 P05496 P06576 P07384 P07437 P07919 P08473 P08574 P09669 P0DP23 P0DPH7 P10606 P10636 P12074 P12235 …	under	0.985685	0.994007	0.0406977
hsa04610	Complement and coagulation cascades	1	323	56	4113	0.003096	0.013615	P00488	P00488 P00734 P00736 P00740 P00742 P00746 P00747 P00748 P00751 P01008 P01009 P01023 P01024 P01031 P01042 P02671 P02675 P02679 P02745 P02746 P02747 P02748 P03952 P04003 P04004 P04070 P04275 P05107 P05120 P05154 P05155 P05156 P05546 P06681 P07093 P07225 P07357 P07358 P07360 P08174 P08603 P08697 P09871 P0C0L4 P10643 P10909 P11215 P12259 P13671 P13987 P20851 Q03405 Q03591 Q96IY4 Q9UNN8 Q9Y279	under	0.990071	0.994007	0.0178571
hsa04814	Motor proteins	1	323	62	4113	0.003096	0.015074	Q12965	A1A5D9 B0I1T2 O00139 O00159 O00399 O14950 O43237 O43795 O75935 O94832 P04350 P05976 P06753 P07437 P07951 P09493 P0DPH7 P23258 P24844 P33176 P35579 P35580 P35749 P42025 P47755 P47756 P52907 P60660 P60709 P61163 P63167 P63172 P63267 P67936 P68133 P68366 P68371 Q07866 Q12965 Q13409 Q13509 Q13561 Q13885 Q14203 Q14204 Q6P597 Q7Z406 Q86VH2 Q8NCM8 Q92614 Q96FJ2 Q9BQE3 Q9BUF5 Q9BW19 Q9H1H9 Q9NP97 Q9NZ32 …	under	0.993966	0.994007	0.016129
hsa03010	Ribosome	2	323	88	4113	0.006192	0.021396	P62979 Q9NRX2	O60783 O75394 P05386 P05387 P05388 P08708 P08865 P15880 P18077 P18124 P18621 P23396 P25398 P26373 P27635 P30050 P32969 P35268 P36578 P39019 P39023 P40429 P42677 P42766 P46776 P46777 P46778 P46779 P46781 P46782 P46783 P47914 P49207 P49406 P50914 P52815 P60866 P61247 P61254 P61313 P61353 P61513 P62081 P62241 P62244 P62249 P62263 P62266 P62269 P62273 P62277 P62280 P62424 P62701 P62750 P62753 P62829 …	under	0.994007	0.994007	0.0227273
